# Supplementary material for: Integrating multiple sources of biodiversity information greatly expands the range of a rare species of Hymenoptera (Vanhorniidae)
Source: Biodivers Data J. 2019 Jul 16;7:e37569. doi: 10.3897/BDJ.7.e37569 (PMC6650442; doi:10.3897/BDJ.7.e37569)
Supplement: Supplementary material 1 — Vanhornia eucnemidarum NA Records [file bdj-07-e37569-s001.xlsx]

## Sheet: Occurrence
typeStatus	occurrenceID	catalogNumber	recordedBy	sex	lifeStage	scientificName	kingdom	phylum	class	order	family	genus	taxonRank	scientificNameAuthorship	continent	country	countryCode	stateProvince	verbatimLocality	decimalLatitude	decimalLongitude	geodeticDatum	samplingProtocol	eventDate	year	month	day	habitat	institutionCode	basisOfRecord	occuranceRemarks
Other material	UCFC:Veuc:00000001		P.P. Bably		adult	Vanhornia eucnemidarum Crawford, 1909	Animalia	Arthropoda	Insecta	Hymenoptera	Vanhorniidae	Vanhornia	species	Crawford 1909	North America	United States	US	New York	6-Mile Creek Ithaca			WGS84	none specified	1927-07-06	1927	07	06		AMNH	PreservedSpecimen
Other material	UCFC:Veuc:00000002		M & TM Favreau		adult	Vanhornia eucnemidarum Crawford, 1909	Animalia	Arthropoda	Insecta	Hymenoptera	Vanhorniidae	Vanhornia	species	Crawford 1909	North America	United States	US	New York	Lewisboro Westchester Co.			WGS84	none specified	1969-07-05	1969	07	05		AMNH	PreservedSpecimen
Other material	UCFC:Veuc:00000003		M & TM Favreau		adult	Vanhornia eucnemidarum Crawford, 1909	Animalia	Arthropoda	Insecta	Hymenoptera	Vanhorniidae	Vanhornia	species	Crawford 1909	North America	United States	US	New York	Lewisboro Westchester Co.			WGS84	none specified	1969-07-05	1969	07	05		AMNH	PreservedSpecimen
Other material	UCFC:Veuc:00000004		M. Favreau		adult	Vanhornia eucnemidarum Crawford, 1909	Animalia	Arthropoda	Insecta	Hymenoptera	Vanhorniidae	Vanhornia	species	Crawford 1909	North America	United States	US	New York	Lewisboro Westchester Co.			WGS84	none specified	1980-04-10	1980	04	10		AMNH	PreservedSpecimen
Other material	UCFC:Veuc:00000005		M. Kamran		adult	Vanhornia eucnemidarum Crawford, 1909	Animalia	Arthropoda	Insecta	Hymenoptera	Vanhorniidae	Vanhornia	species	Crawford 1909	North America	United States	US	New York	South Haven Long Island			WGS84	none specified	1974-06-01/09	1974	06	01/09		AMNH	PreservedSpecimen
Other material	UCFC:Veuc:00000006		M. Kamran		adult	Vanhornia eucnemidarum Crawford, 1909	Animalia	Arthropoda	Insecta	Hymenoptera	Vanhorniidae	Vanhornia	species	Crawford 1909	North America	United States	US	New York	South Haven Long Island			WGS84	none specified	1974-07-04	1974	07	04		AMNH	PreservedSpecimen
Other material	UCFC:Veuc:00000007		M. Kamran		adult	Vanhornia eucnemidarum Crawford, 1909	Animalia	Arthropoda	Insecta	Hymenoptera	Vanhorniidae	Vanhornia	species	Crawford 1909	North America	United States	US	New York	South Haven Long Island			WGS84	none specified	1975-07-19	1975	07	19		AMNH	PreservedSpecimen
Other material	UCFC:Veuc:00000008		M. Kamran		adult	Vanhornia eucnemidarum Crawford, 1909	Animalia	Arthropoda	Insecta	Hymenoptera	Vanhorniidae	Vanhornia	species	Crawford 1909	North America	United States	US	New York	South Haven Long Island			WGS84	none specified	1976-06-23/30	1976	06	23/30		AMNH	PreservedSpecimen
Other material	UCFC:Veuc:00000009	OSUC 120010		female	adult	Vanhornia eucnemidarum Crawford, 1909	Animalia	Arthropoda	Insecta	Hymenoptera	Vanhorniidae	Vanhornia	species	Crawford 1909	North America	Canada	CA	Ontario	Aylmer West	42.7667	-80.9833	WGS84	Malaise trap	1972-07-20/24	1972	07	20/24		ANIC	PreservedSpecimen
Other material	UCFC:Veuc:00000010	OSUC 120011		female	adult	Vanhornia eucnemidarum Crawford, 1909	Animalia	Arthropoda	Insecta	Hymenoptera	Vanhorniidae	Vanhornia	species	Crawford 1909	North America	Canada	CA	Ontario	Shaw Forest, nr. Eganville	45.6372	-77.1403	WGS84	Pan Trap	1992-07/08-30/06	1992	07/08	30/06		ANIC	PreservedSpecimen
Other material	UCFC:Veuc:00000011	OSUC 120012		female	adult	Vanhornia eucnemidarum Crawford, 1909	Animalia	Arthropoda	Insecta	Hymenoptera	Vanhorniidae	Vanhornia	species	Crawford 1909	North America	United States	US	Maryland	Plummers Island, Montgomery Co.	38.9694	-77.1764	WGS84	none specified	1910-05-06	1910	05	06	Sycamore	ANIC	PreservedSpecimen	Ex sycamore log containing Thropa + Nematodes
Other material	UCFC:Veuc:00000012	OSUC 17503	P.P. Babiy	female	adult	Vanhornia eucnemidarum Crawford, 1909	Animalia	Arthropoda	Insecta	Hymenoptera	Vanhorniidae	Vanhornia	species	Crawford 1909	North America	Canada	CA	New York	Ithaca, Six Mile Creek, Tompkins Co., NY	42.4406	-76.4969	WGS84	none specified	1937-07-13	1937	07	13		BMNH	PreservedSpecimen
Other material	UCFC:Veuc:00000013	OSUC 17502		female	adult	Vanhornia eucnemidarum Crawford, 1909	Animalia	Arthropoda	Insecta	Hymenoptera	Vanhorniidae	Vanhornia	species	Crawford 1909	North America	Canada	CA	Ontario	7mi E Griffith	45.2439	-76.9994	WGS84	Malaise Trap	1989-07/08-25/05	1989	07/08	25/05		BMNH	PreservedSpecimen
Other material	UCFC:Veuc:00000014	OSUC 17506	B. Carlson	female	adult	Vanhornia eucnemidarum Crawford, 1909	Animalia	Arthropoda	Insecta	Hymenoptera	Vanhorniidae	Vanhornia	species	Crawford 1909	North America	United States	US	Michigan	Benzie Co.	44.65	-86.0167	WGS84	none specified	1967-08	1967	08			BMNH	PreservedSpecimen
Other material	UCFC:Veuc:00000015	OSUC 17505	B. Carlson	female	adult	Vanhornia eucnemidarum Crawford, 1909	Animalia	Arthropoda	Insecta	Hymenoptera	Vanhorniidae	Vanhornia	species	Crawford 1909	North America	United States	US	Michigan	Benzie Co.	44.65	-86.0167	WGS84	none specified	1967-08	1967	08			BMNH	PreservedSpecimen
Other material	UCFC:Veuc:00000016	OSUC 17507	B. Carlson	female	adult	Vanhornia eucnemidarum Crawford, 1909	Animalia	Arthropoda	Insecta	Hymenoptera	Vanhorniidae	Vanhornia	species	Crawford 1909	North America	United States	US	Michigan	Benzie Co.	44.65	-86.0167	WGS84	none specified	1967-08	1967	08			BMNH	PreservedSpecimen
Other material	UCFC:Veuc:00000017		B. DeJonge		adult	Vanhornia eucnemidarum Crawford, 1909	Animalia	Arthropoda	Insecta	Hymenoptera	Vanhorniidae	Vanhornia	species	Crawford 1909	North America	Canada	CA	Ontario	Anacaster			WGS84	none specified	1995-07-05	1995	07	05		CAS	PreservedSpecimen
Other material	UCFC:Veuc:00000018		H.I. Scudder		adult	Vanhornia eucnemidarum Crawford, 1909	Animalia	Arthropoda	Insecta	Hymenoptera	Vanhorniidae	Vanhornia	species	Crawford 1909	North America	United States	US	New York	Ithaca, Six Mile Creek	42.4285	-76.4791	WGS84	none specified	1937-07-08	1937	07	08	Beech	CAS	PreservedSpecimen	On sound dead Beech where bark had fallen off
Other material	UCFC:Veuc:00000019		Marting		adult	Vanhornia eucnemidarum Crawford, 1909	Animalia	Arthropoda	Insecta	Hymenoptera	Vanhorniidae	Vanhornia	species	Crawford 1909	North America	United States	US	Ohio	Hunting Valley Cuyahoga Co.	41.4765	-81.4131	WGS84	Yellow Pan Trap	2009-07-20/22	2009	07	20/22	Black Birch	CLEV	PreservedSpecimen
Other material	UCFC:Veuc:00000020		Pucci, T. M.		adult	Vanhornia eucnemidarum Crawford, 1909	Animalia	Arthropoda	Insecta	Hymenoptera	Vanhorniidae	Vanhornia	species	Crawford 1909	North America	United States	US	Ohio	Hunting Valley Luce Creek Preserve Cuyahoga Co.	41.4761	-81.4011	WGS84	Malaise Trap	2003-06/07-27/16	2003	06/07	27/16		CLEV	PreservedSpecimen
Other material	UCFC:Veuc:00000021		Pucci, T. M.		adult	Vanhornia eucnemidarum Crawford, 1909	Animalia	Arthropoda	Insecta	Hymenoptera	Vanhorniidae	Vanhornia	species	Crawford 1909	North America	United States	US	Ohio	Taber Preserve Ashtabula Co.	41.4492	-81.3717	WGS84	Malaise Trap	2007-06/07-23/14	2007	06/07	23/14		CLEV	PreservedSpecimen
Other material	UCFC:Veuc:00000022	CNC1194361	B.E. Cooper		adult	Vanhornia eucnemidarum Crawford, 1909	Animalia	Arthropoda	Insecta	Hymenoptera	Vanhorniidae	Vanhornia	species	Crawford 1909	North America	Canada	CA	Ontario	7mi E. Griffith, Ont.			WGS84	Malaise Trap	1989-07/08-25/25	1989	07/08	25/25		CNCI	PreservedSpecimen
Other material	UCFC:Veuc:00000023	CNC1194356	B.E. Cooper		adult	Vanhornia eucnemidarum Crawford, 1909	Animalia	Arthropoda	Insecta	Hymenoptera	Vanhorniidae	Vanhornia	species	Crawford 1909	North America	Canada	CA	Ontario	7mi. E. Griffith, Ont.			WGS84	none specified	1991-07-20	1991	07	20		CNCI	PreservedSpecimen
Other material	UCFC:Veuc:00000024	CNC1194410	B.E. Cooper		adult	Vanhornia eucnemidarum Crawford, 1909	Animalia	Arthropoda	Insecta	Hymenoptera	Vanhorniidae	Vanhornia	species	Crawford 1909	North America	Canada	CA	Ontario	7mi. E. Griffith, Ont.			WGS84	Malaise Trap	1989-07-08	1989	07	08		CNCI	PreservedSpecimen
Other material	UCFC:Veuc:00000025	CNC1194411	B.E. Cooper		adult	Vanhornia eucnemidarum Crawford, 1909	Animalia	Arthropoda	Insecta	Hymenoptera	Vanhorniidae	Vanhornia	species	Crawford 1909	North America	Canada	CA	Ontario	7mi. E. Griffith, Ont.			WGS84	Malaise Trap	1989-07-08	1989	07	08		CNCI	PreservedSpecimen
Other material	UCFC:Veuc:00000026	CNC1194368			adult	Vanhornia eucnemidarum Crawford, 1909	Animalia	Arthropoda	Insecta	Hymenoptera	Vanhorniidae	Vanhornia	species	Crawford 1909	North America	Canada	CA	Ontario	Aylmer West, ONT.			WGS84	Malaise Trap	1972-07-17/20	1972	07	17/20		CNCI	PreservedSpecimen
Other material	UCFC:Veuc:00000027	CNC1194357	M. Sanborne		adult	Vanhornia eucnemidarum Crawford, 1909	Animalia	Arthropoda	Insecta	Hymenoptera	Vanhorniidae	Vanhornia	species	Crawford 1909	North America	Canada	CA	Ontario	Hamilton ONT.			WGS84	none specified	1981-06-14/21	1981	06	14/21		CNCI	PreservedSpecimen
Other material	UCFC:Veuc:00000028	CNC1194358	Bruce Gill		adult	Vanhornia eucnemidarum Crawford, 1909	Animalia	Arthropoda	Insecta	Hymenoptera	Vanhorniidae	Vanhornia	species	Crawford 1909	North America	Canada	CA	Ontario	L. Mazinaw			WGS84	Flight Interception Trap	1987-07-01/18	1987	07	01/18		CNCI	PreservedSpecimen
Other material	UCFC:Veuc:00000029	CNC1194412	L. Masner & J. Denis		adult	Vanhornia eucnemidarum Crawford, 1909	Animalia	Arthropoda	Insecta	Hymenoptera	Vanhorniidae	Vanhornia	species	Crawford 1909	North America	Canada	CA	Ontario	ON 5km NW Kemptville			WGS84	Malaise Trap	1990-07-10/17	1990	07	10/17		CNCI	PreservedSpecimen
Other material	UCFC:Veuc:00000030	CNC1194369	H. Goulet L. Masner		adult	Vanhornia eucnemidarum Crawford, 1909	Animalia	Arthropoda	Insecta	Hymenoptera	Vanhorniidae	Vanhornia	species	Crawford 1909	North America	Canada	CA	Ontario	ON 5kmSE Kemptville			WGS84	none specified	1990-07-17/24	1990	07	17/24		CNCI	PreservedSpecimen
Other material	UCFC:Veuc:00000031	CNC1194390	J. Read		adult	Vanhornia eucnemidarum Crawford, 1909	Animalia	Arthropoda	Insecta	Hymenoptera	Vanhorniidae	Vanhornia	species	Crawford 1909	North America	Canada	CA	Ontario	ON Buckingham's Bay	45.4936	-76.113	WGS84	Malaise Trap	2010-07-01/14	2010	07	01/14		CNCI	PreservedSpecimen
Other material	UCFC:Veuc:00000032	CNC1194388	S. & J. Peck		adult	Vanhornia eucnemidarum Crawford, 1909	Animalia	Arthropoda	Insecta	Hymenoptera	Vanhorniidae	Vanhornia	species	Crawford 1909	North America	Canada	CA	Ontario	ON, Limoges Larose Forest, mixed forest, 63m	45.3784	-75.2563	WGS84	none specified	2001-07-01/30	2001	07	01/30		CNCI	PreservedSpecimen
Other material	UCFC:Veuc:00000033	CNC1194383	H. Goulet		adult	Vanhornia eucnemidarum Crawford, 1909	Animalia	Arthropoda	Insecta	Hymenoptera	Vanhorniidae	Vanhornia	species	Crawford 1909	North America	Canada	CA	Ontario	ON, Ottawa city garden	45.3561	-75.7091	WGS84	Malaise Trap	2007-07-13/23	2007	07	13/23		CNCI	PreservedSpecimen
Other material	UCFC:Veuc:00000034	CNC1194384	H. Goulet		adult	Vanhornia eucnemidarum Crawford, 1909	Animalia	Arthropoda	Insecta	Hymenoptera	Vanhorniidae	Vanhornia	species	Crawford 1909	North America	Canada	CA	Ontario	ON, Ottawa city garden	45.3561	-75.7091	WGS84	Malaise Trap	2007-07-13/23	2007	07	13/23		CNCI	PreservedSpecimen
Other material	UCFC:Veuc:00000035	CNC1194387	H. Goulet		adult	Vanhornia eucnemidarum Crawford, 1909	Animalia	Arthropoda	Insecta	Hymenoptera	Vanhorniidae	Vanhornia	species	Crawford 1909	North America	Canada	CA	Ontario	ON, Ottawa city garden	45.3561	-75.7091	WGS84	none specified	2010-07-07/12	2010	07	07/12		CNCI	PreservedSpecimen
Other material	UCFC:Veuc:00000036	CNC1194393	Goulet & Fernandez		adult	Vanhornia eucnemidarum Crawford, 1909	Animalia	Arthropoda	Insecta	Hymenoptera	Vanhorniidae	Vanhornia	species	Crawford 1909	North America	Canada	CA	Ontario	ON, Ottawa Mer Bleue	45.3925	-75.5187	WGS84	Malaise Trap	2016-07-12/19	2016	07	12/19		CNCI	PreservedSpecimen
Other material	UCFC:Veuc:00000037	CNC1194394	Goulet & Fernandez		adult	Vanhornia eucnemidarum Crawford, 1909	Animalia	Arthropoda	Insecta	Hymenoptera	Vanhorniidae	Vanhornia	species	Crawford 1909	North America	Canada	CA	Ontario	ON, Ottawa Mer Bleue	45.3925	-75.5187	WGS84	Malaise Trap	2016-07-12/19	2016	07	12/19		CNCI	PreservedSpecimen
Other material	UCFC:Veuc:00000038	CNC1194395	J. Fernández		adult	Vanhornia eucnemidarum Crawford, 1909	Animalia	Arthropoda	Insecta	Hymenoptera	Vanhorniidae	Vanhornia	species	Crawford 1909	North America	Canada	CA	Ontario	ON, Ottawa Mer Bleue	45.3833	-75.5022	WGS84	Malaise Trap	2016-07-19/26	2016	07	19/26		CNCI	PreservedSpecimen
Other material	UCFC:Veuc:00000039	CNC1194392	Goulet & Fernandez		adult	Vanhornia eucnemidarum Crawford, 1909	Animalia	Arthropoda	Insecta	Hymenoptera	Vanhorniidae	Vanhornia	species	Crawford 1909	North America	Canada	CA	Ontario	ON, Ottawa Stony Swamp	45.3925	-75.5188	WGS84	Malaise Trap	2016-07-05/12	2016	07	05/12		CNCI	PreservedSpecimen
Other material	UCFC:Veuc:00000040	CNC1194396	Baudreault, Goulet & Fernandez		adult	Vanhornia eucnemidarum Crawford, 1909	Animalia	Arthropoda	Insecta	Hymenoptera	Vanhorniidae	Vanhornia	species	Crawford 1909	North America	Canada	CA	Ontario	ON, Ottawa, Fletcher Garden	45.3833	-75.7022	WGS84	Malaise Trap	2016-07/08-28/18	2016	07/08	28/18		CNCI	PreservedSpecimen
Other material	UCFC:Veuc:00000041	CNC1194419	H. Goulet		adult	Vanhornia eucnemidarum Crawford, 1909	Animalia	Arthropoda	Insecta	Hymenoptera	Vanhorniidae	Vanhornia	species	Crawford 1909	North America	Canada	CA	Ontario	On, Ottawa; city garden	45.3561	-75.7091	WGS84	Malaise Trap	2008-07/08	2008	07/08			CNCI	PreservedSpecimen
Other material	UCFC:Veuc:00000042	CNC1194414	H. Goulet & L. Masner		adult	Vanhornia eucnemidarum Crawford, 1909	Animalia	Arthropoda	Insecta	Hymenoptera	Vanhorniidae	Vanhornia	species	Crawford 1909	North America	Canada	CA	Ontario	ON, Petrie Island; Hickory & Bladdernut	45.4989	-75.5052	WGS84	Yellow Pan Trap	2015-07-01/08	2015	07	01/08		CNCI	PreservedSpecimen
Other material	UCFC:Veuc:00000043	CNC1194376	M. Sharkey		adult	Vanhornia eucnemidarum Crawford, 1909	Animalia	Arthropoda	Insecta	Hymenoptera	Vanhorniidae	Vanhornia	species	Crawford 1909	North America	Canada	CA	Ontario	ON, Renfrew Co. Shaw Forest, 6km NNE Eganville	45.6333	-77.0689	WGS84	Malaise Trap	1993-07-09/22	1993	07	09/22		CNCI	PreservedSpecimen
Other material	UCFC:Veuc:00000044	CNC1194391	J.D. Read		adult	Vanhornia eucnemidarum Crawford, 1909	Animalia	Arthropoda	Insecta	Hymenoptera	Vanhorniidae	Vanhornia	species	Crawford 1909	North America	Canada	CA	Ontario	ON, Woodlawn, edge of deciduous forest	45.4936	-76.113	WGS84	Malaise Trap	2015-07-07/14	2015	07	07/14		CNCI	PreservedSpecimen
Other material	UCFC:Veuc:00000045	CNC1194413	J.D. Read		adult	Vanhornia eucnemidarum Crawford, 1909	Animalia	Arthropoda	Insecta	Hymenoptera	Vanhorniidae	Vanhornia	species	Crawford 1909	North America	Canada	CA	Ontario	ON, Woodlawn, edge of deciduous forest	45.4936	-76.113	WGS84	Malaise Trap	2015-07-07/14	2015	07	07/14		CNCI	PreservedSpecimen
Other material	UCFC:Veuc:00000046	CNC1194353	Masner, Denis		adult	Vanhornia eucnemidarum Crawford, 1909	Animalia	Arthropoda	Insecta	Hymenoptera	Vanhorniidae	Vanhornia	species	Crawford 1909	North America	Canada	CA	Ontario	ON; 2kmSE Innisville	45.05	-76.2522	WGS84	Flight Interception Trap	1991-07-03/10	1991	07	03/10		CNCI	PreservedSpecimen
Other material	UCFC:Veuc:00000047	CNC1194375	B. DeJonge		adult	Vanhornia eucnemidarum Crawford, 1909	Animalia	Arthropoda	Insecta	Hymenoptera	Vanhorniidae	Vanhornia	species	Crawford 1909	North America	Canada	CA	Ontario	ON; Anacaster; woodpile			WGS84	none specified	1995-06-17/26	1995	06	17/26		CNCI	PreservedSpecimen
Other material	UCFC:Veuc:00000048	CNC1194373	M. Sharkey		adult	Vanhornia eucnemidarum Crawford, 1909	Animalia	Arthropoda	Insecta	Hymenoptera	Vanhorniidae	Vanhornia	species	Crawford 1909	North America	Canada	CA	Ontario	ON; Shaw Forest nr. Eganville			WGS84	Malaise Trap	1992-08-06/13	1992	08	06/13		CNCI	PreservedSpecimen
Other material	UCFC:Veuc:00000049	CNC1194374	M. Sharkey		adult	Vanhornia eucnemidarum Crawford, 1909	Animalia	Arthropoda	Insecta	Hymenoptera	Vanhorniidae	Vanhornia	species	Crawford 1909	North America	Canada	CA	Ontario	ON; Shaw Forest nr. Eganville			WGS84	Malaise Trap	1992-08-06/13	1992	08	06/13		CNCI	PreservedSpecimen
Other material	UCFC:Veuc:00000050	CNC1194378	M. Sharkey		adult	Vanhornia eucnemidarum Crawford, 1909	Animalia	Arthropoda	Insecta	Hymenoptera	Vanhorniidae	Vanhornia	species	Crawford 1909	North America	Canada	CA	Ontario	ON; Shaw Forest nr. Eganville			WGS84	Malaise Trap	1992-07-23/30	1992	07	23/30		CNCI	PreservedSpecimen
Other material	UCFC:Veuc:00000051	CNC1194365	Mason		adult	Vanhornia eucnemidarum Crawford, 1909	Animalia	Arthropoda	Insecta	Hymenoptera	Vanhorniidae	Vanhornia	species	Crawford 1909	North America	Canada	CA	Ontario	Ont. Flint Hill nr Kemptville			WGS84	none specified	1983-08-16/23	1983	08	16/23		CNCI	PreservedSpecimen
Other material	UCFC:Veuc:00000052	CNC1194371	M. Sanborne		adult	Vanhornia eucnemidarum Crawford, 1909	Animalia	Arthropoda	Insecta	Hymenoptera	Vanhorniidae	Vanhornia	species	Crawford 1909	North America	Canada	CA	Ontario	Ont. Hamilton			WGS84	Malaise Trap	1980-08-19/28	1980	08	19/28		CNCI	PreservedSpecimen
Other material	UCFC:Veuc:00000053	CNC1194351	H. Goulet		adult	Vanhornia eucnemidarum Crawford, 1909	Animalia	Arthropoda	Insecta	Hymenoptera	Vanhorniidae	Vanhornia	species	Crawford 1909	North America	Canada	CA	Ontario	ONT., Ottawa			WGS84	Malaise Trap	1989-07/08	1989	07/08			CNCI	PreservedSpecimen
Other material	UCFC:Veuc:00000054	CNC1194349	L. Masner		adult	Vanhornia eucnemidarum Crawford, 1909	Animalia	Arthropoda	Insecta	Hymenoptera	Vanhorniidae	Vanhornia	species	Crawford 1909	North America	Canada	CA	Ontario	ONT: Nepean NCC Log Farm			WGS84	Pan Trap	1989-07-14/29	1989	07	14/29		CNCI	PreservedSpecimen
Other material	UCFC:Veuc:00000055	CNC1194352	L. Masner		adult	Vanhornia eucnemidarum Crawford, 1909	Animalia	Arthropoda	Insecta	Hymenoptera	Vanhorniidae	Vanhornia	species	Crawford 1909	North America	Canada	CA	Ontario	ONT: Nepean NCC Log Farm			WGS84	Pan Trap	1989-07-12/16	1989	07	12/16		CNCI	PreservedSpecimen
Other material	UCFC:Veuc:00000056	CNC1194346	H. Goulet		adult	Vanhornia eucnemidarum Crawford, 1909	Animalia	Arthropoda	Insecta	Hymenoptera	Vanhorniidae	Vanhornia	species	Crawford 1909	North America	Canada	CA	Ontario	Ottawa			WGS84	Malaise Trap	1985-07-15/21	1985	07	15/21		CNCI	PreservedSpecimen
Other material	UCFC:Veuc:00000057	CNC1194343	J.M. Cumming		adult	Vanhornia eucnemidarum Crawford, 1909	Animalia	Arthropoda	Insecta	Hymenoptera	Vanhorniidae	Vanhornia	species	Crawford 1909	North America	Canada	CA	Ontario	Ottawa, nr. Uplands Airport			WGS84	Malaise Trap	1990-07-17/23	1990	07	17/23		CNCI	PreservedSpecimen
Other material	UCFC:Veuc:00000058	CNC1194348	L. Masner		adult	Vanhornia eucnemidarum Crawford, 1909	Animalia	Arthropoda	Insecta	Hymenoptera	Vanhorniidae	Vanhornia	species	Crawford 1909	North America	Canada	CA	Ontario	Randeau Provential Park			WGS84	Malaise Trap	1979-06/07-15/14	1979	06/07	15/14		CNCI	PreservedSpecimen
Other material	UCFC:Veuc:00000059	CNC1194337	PORC team		adult	Vanhornia eucnemidarum Crawford, 1909	Animalia	Arthropoda	Insecta	Hymenoptera	Vanhorniidae	Vanhornia	species	Crawford 1909	North America	Canada	CA	Quebec	P.Q. Gatineau Pk. nr. Pilon Rd.			WGS84	Flight Interception Trap	1992-07/08-27/04	1992	07/08	27/04		CNCI	PreservedSpecimen
Other material	UCFC:Veuc:00000060	CNC1194338	CNC Hymenop. Team		adult	Vanhornia eucnemidarum Crawford, 1909	Animalia	Arthropoda	Insecta	Hymenoptera	Vanhorniidae	Vanhornia	species	Crawford 1909	North America	Canada	CA	Quebec	Parc de la Gatineau, 0.5 km E Chemin Pilon			WGS84	none specified	1992-07-22/28	1992	07	22/28		CNCI	PreservedSpecimen
Other material	UCFC:Veuc:00000061	CNC1194382	L. Masner		adult	Vanhornia eucnemidarum Crawford, 1909	Animalia	Arthropoda	Insecta	Hymenoptera	Vanhorniidae	Vanhornia	species	Crawford 1909	North America	Canada	CA	Quebec	PQ; Parc Gatineau Chemin Ridge woodpile			WGS84	none specified	1995-09/11	1995	09/11			CNCI	PreservedSpecimen
Other material	UCFC:Veuc:00000062	CNC1194389	CNC Hym. team		adult	Vanhornia eucnemidarum Crawford, 1909	Animalia	Arthropoda	Insecta	Hymenoptera	Vanhorniidae	Vanhornia	species	Crawford 1909	North America	Canada	CA	Quebec	QC, Gatineau Park 1.8km N. Eardley, 60-80m	45.5667	-76.0936	WGS84	Malaise Trap	2012-06-07/15	2012	06	07/15		CNCI	PreservedSpecimen
Other material	UCFC:Veuc:00000063	CNC1194372	CNC HYMENOP. TEAM		adult	Vanhornia eucnemidarum Crawford, 1909	Animalia	Arthropoda	Insecta	Hymenoptera	Vanhorniidae	Vanhornia	species	Crawford 1909	North America	Canada	CA	Quebec	QU. Parc de la Gatineau, 0.5 km E Chemin Pilon			WGS84	none specified	1992-07-15/21	1992	07	15/21		CNCI	PreservedSpecimen
Other material	UCFC:Veuc:00000064	CNC1194370	M. Sanborne		adult	Vanhornia eucnemidarum Crawford, 1909	Animalia	Arthropoda	Insecta	Hymenoptera	Vanhorniidae	Vanhornia	species	Crawford 1909	North America	Canada	CA	Quebec	Quebec Mont St.-Bruno			WGS84	Malaise Trap	1987-07-06	1987	07	06		CNCI	PreservedSpecimen
Other material	UCFC:Veuc:00000065	CNC1194347	M. Sharkey		adult	Vanhornia eucnemidarum Crawford, 1909	Animalia	Arthropoda	Insecta	Hymenoptera	Vanhorniidae	Vanhornia	species	Crawford 1909	North America	United States	US	Florida	Alachua Co. Gainesville, AEI			WGS84	Malaise Trap	1986-04-12/19	1986	04	12/19		CNCI	PreservedSpecimen
Other material	UCFC:Veuc:00000066	CNC1194386	S. Peck		adult	Vanhornia eucnemidarum Crawford, 1909	Animalia	Arthropoda	Insecta	Hymenoptera	Vanhorniidae	Vanhornia	species	Crawford 1909	North America	United States	US	Florida	Fl, Leon Co., 20km N. Tallahassee, Tall Timbers Res. Station, mixed forest	30.666	-84.2237	WGS84	Malaise Trap	2010-04-01/27	2010	04	01/27		CNCI	PreservedSpecimen
Other material	UCFC:Veuc:00000067	CNC1194360			adult	Vanhornia eucnemidarum Crawford, 1909	Animalia	Arthropoda	Insecta	Hymenoptera	Vanhorniidae	Vanhornia	species	Crawford 1909	North America	United States	US	Georgia	Forsyth, ga.			WGS84	Malaise Trap	1970-05-18/23	1970	05	18/23		CNCI	PreservedSpecimen
Other material	UCFC:Veuc:00000068	CNC1194377	R. Grundel		adult	Vanhornia eucnemidarum Crawford, 1909	Animalia	Arthropoda	Insecta	Hymenoptera	Vanhorniidae	Vanhornia	species	Crawford 1909	North America	United States	US	Indiana	IN: Porter Co. Indiana Dunes N.L. Inland Marsh			WGS84	Malaise Trap	1997-07-21	1997	07	21		CNCI	PreservedSpecimen
Other material	UCFC:Veuc:00000069	CNC1194399	A. Denno, E. Grissell		adult	Vanhornia eucnemidarum Crawford, 1909	Animalia	Arthropoda	Insecta	Hymenoptera	Vanhorniidae	Vanhornia	species	Crawford 1909	North America	United States	US	Maryland	Maryland: Howard Co., Clarksville			WGS84	Malaise Trap	1988-05-18	1988	05	18		CNCI	PreservedSpecimen
Other material	UCFC:Veuc:00000070	CNC1194379	G. Gibson		adult	Vanhornia eucnemidarum Crawford, 1909	Animalia	Arthropoda	Insecta	Hymenoptera	Vanhorniidae	Vanhornia	species	Crawford 1909	North America	United States	US	Maryland	MD, Montgomery Co. 4 mi SW Ashton	39.11	-77.0272	WGS84	none specified	2004-04-10	2004	04	10		CNCI	PreservedSpecimen
Other material	UCFC:Veuc:00000071	CNC1194340	R.C. Shannon		adult	Vanhornia eucnemidarum Crawford, 1909	Animalia	Arthropoda	Insecta	Hymenoptera	Vanhorniidae	Vanhornia	species	Crawford 1909	North America	United States	US	Maryland	Plummers Island			WGS84	none specified	1914-06-13	1914	06	13		CNCI	PreservedSpecimen
Other material	UCFC:Veuc:00000072	CNC1194344	D.B. Wahl		adult	Vanhornia eucnemidarum Crawford, 1909	Animalia	Arthropoda	Insecta	Hymenoptera	Vanhorniidae	Vanhornia	species	Crawford 1909	North America	United States	US	Maryland	Prince George's Country Patuxent Research Station			WGS84	none specified	1925-06-21/29	1925	06	21/29		CNCI	PreservedSpecimen
Other material	UCFC:Veuc:00000073	CNC1194350	J. Becker		adult	Vanhornia eucnemidarum Crawford, 1909	Animalia	Arthropoda	Insecta	Hymenoptera	Vanhorniidae	Vanhornia	species	Crawford 1909	North America	United States	US	Missouri	Mo, Wayne Co. Williamsville			WGS84	Malaise Trap	1988-05	1988	05			CNCI	PreservedSpecimen
Other material	UCFC:Veuc:00000074	CNC1194362	J. Becker		adult	Vanhornia eucnemidarum Crawford, 1909	Animalia	Arthropoda	Insecta	Hymenoptera	Vanhorniidae	Vanhornia	species	Crawford 1909	North America	United States	US	Missouri	Mo, Wayne Co. Williamsville			WGS84	Malaise Trap	1985-06	1985	06			CNCI	PreservedSpecimen
Other material	UCFC:Veuc:00000075	CNC1194341	W.J. Morse		adult	Vanhornia eucnemidarum Crawford, 1909	Animalia	Arthropoda	Insecta	Hymenoptera	Vanhorniidae	Vanhornia	species	Crawford 1909	North America	United States	US	New Hampshire	Durham, NH			WGS84	none specified	1971-07-22	1971	07	22		CNCI	PreservedSpecimen
Other material	UCFC:Veuc:00000076	CNC1194417	George R. Ferguson		adult	Vanhornia eucnemidarum Crawford, 1909	Animalia	Arthropoda	Insecta	Hymenoptera	Vanhorniidae	Vanhornia	species	Crawford 1909	North America	United States	US	New Jersey	Westfield, N.J.			WGS84	none specified	1954-06-12	1954	06	12		CNCI	PreservedSpecimen
Other material	UCFC:Veuc:00000077	CNC1194418	George R. Ferguson		adult	Vanhornia eucnemidarum Crawford, 1909	Animalia	Arthropoda	Insecta	Hymenoptera	Vanhorniidae	Vanhornia	species	Crawford 1909	North America	United States	US	New Jersey	Westfield, N.J.			WGS84	none specified	1954-06-12	1954	06	12		CNCI	PreservedSpecimen
Other material	UCFC:Veuc:00000078	CNC1194339	Mason		adult	Vanhornia eucnemidarum Crawford, 1909	Animalia	Arthropoda	Insecta	Hymenoptera	Vanhorniidae	Vanhornia	species	Crawford 1909	North America	United States	US	New York	Ithaca N.Y.			WGS84	none specified	1947-07-05	1947	07	05		CNCI	PreservedSpecimen
Other material	UCFC:Veuc:00000079	CNC1194381	Mason		adult	Vanhornia eucnemidarum Crawford, 1909	Animalia	Arthropoda	Insecta	Hymenoptera	Vanhorniidae	Vanhornia	species	Crawford 1909	North America	United States	US	New York	Ithaca N.Y.			WGS84	none specified	1947-07-05	1947	07	05		CNCI	PreservedSpecimen
Other material	UCFC:Veuc:00000080	CNC1194363			adult	Vanhornia eucnemidarum Crawford, 1909	Animalia	Arthropoda	Insecta	Hymenoptera	Vanhorniidae	Vanhornia	species	Crawford 1909	North America	United States	US	Quebec	Laniel, Que.			WGS84	none specified	1934-07-21	1934	07	21		CNCI	PreservedSpecimen
Other material	UCFC:Veuc:00000081	CNC1194364	CNC Hymenop. Team		adult	Vanhornia eucnemidarum Crawford, 1909	Animalia	Arthropoda	Insecta	Hymenoptera	Vanhorniidae	Vanhornia	species	Crawford 1909	North America	United States	US	Quebec	QU. Parc de la Gatineau. Chutes de Luskville.			WGS84	Malaise Trap	1992-07-22/28	1992	07	22/28		CNCI	PreservedSpecimen
Other material	UCFC:Veuc:00000082	CNC1194345	S.B. Peck		adult	Vanhornia eucnemidarum Crawford, 1909	Animalia	Arthropoda	Insecta	Hymenoptera	Vanhorniidae	Vanhornia	species	Crawford 1909	North America	United States	US	South Carolina	Oconee Co. 21mi NW Walhalla, Oconee St. Pk. 1700			WGS84	Flight Interception Trap	1981-06/08-03/13	1981	06/08	03/13		CNCI	PreservedSpecimen
Other material	UCFC:Veuc:00000083	CNC1194366	BRC HYM. TEAM		adult	Vanhornia eucnemidarum Crawford, 1909	Animalia	Arthropoda	Insecta	Hymenoptera	Vanhorniidae	Vanhornia	species	Crawford 1909	North America	United States	US	South Carolina	SC: Anderson Co. Pendleton 250m			WGS84	Malaise Trap	1987-06-05/10	1987	06	05/10		CNCI	PreservedSpecimen
Other material	UCFC:Veuc:00000084	CNC1194359	G. Heinrich		adult	Vanhornia eucnemidarum Crawford, 1909	Animalia	Arthropoda	Insecta	Hymenoptera	Vanhorniidae	Vanhornia	species	Crawford 1909	North America	United States	US	Tennessee	Lexington, TENN. Natchez Trace S.P.			WGS84	Malaise Trap	1972-06-11/15	1972	06	11/15		CNCI	PreservedSpecimen
Other material	UCFC:Veuc:00000085	CNC1194385	J. Skevington, T.O. Burt, L. Rocha, S. Kelso		adult	Vanhornia eucnemidarum Crawford, 1909	Animalia	Arthropoda	Insecta	Hymenoptera	Vanhorniidae	Vanhornia	species	Crawford 1909	North America	United States	US	Tennessee	TN: Natchez Trace StatePark; ForestEdge	35.8042	-88.2479	WGS84	Malaise Trap	2013-05-16/21	2013	05	16/21		CNCI	PreservedSpecimen
Other material	UCFC:Veuc:00000086	CNC1194342	S. Peck		adult	Vanhornia eucnemidarum Crawford, 1909	Animalia	Arthropoda	Insecta	Hymenoptera	Vanhorniidae	Vanhornia	species	Crawford 1909	North America	United States	US	Virginia	Bedford Co., 500m Blue Ridge Pkwy, 80km			WGS84	Interception Trap	1981-05/08-31/21	1981	05/08	31/21		CNCI	PreservedSpecimen
Other material	UCFC:Veuc:00000087	CNC1194355	S. Peck		adult	Vanhornia eucnemidarum Crawford, 1909	Animalia	Arthropoda	Insecta	Hymenoptera	Vanhorniidae	Vanhornia	species	Crawford 1909	North America	United States	US	Virginia	VA, Franklin Co. 2560'BlueRidge Pkwy mi. 154 Smart View.			WGS84	Interception Trap	1981-05/08-31/20	1981	05/08	31/20		CNCI	PreservedSpecimen
Other material	UCFC:Veuc:00000088	CNC1194367	David R. Smith		adult	Vanhornia eucnemidarum Crawford, 1909	Animalia	Arthropoda	Insecta	Hymenoptera	Vanhorniidae	Vanhornia	species	Crawford 1909	North America	United States	US	Virginia	VA.: Fairfax Co. near Annandale			WGS84	Malaise Trap	1985-05-25/31	1985	05	25/31		CNCI	PreservedSpecimen
Other material	UCFC:Veuc:00000089	CNC1194400	David R. Smith		adult	Vanhornia eucnemidarum Crawford, 1909	Animalia	Arthropoda	Insecta	Hymenoptera	Vanhorniidae	Vanhornia	species	Crawford 1909	North America	United States	US	Virginia	VA.: Fairfax Co. near Annandale			WGS84	Malaise Trap	1988-06-18	1988	06	18		CNCI	PreservedSpecimen
Other material	UCFC:Veuc:00000090	CNC1194403	David R. Smith		adult	Vanhornia eucnemidarum Crawford, 1909	Animalia	Arthropoda	Insecta	Hymenoptera	Vanhorniidae	Vanhornia	species	Crawford 1909	North America	United States	US	Virginia	VA.: Fairfax Co. near Annandale			WGS84	Malaise Trap	1989-06-03	1989	06	03		CNCI	PreservedSpecimen
Other material	UCFC:Veuc:00000091	CNC1194407	David R. Smith		adult	Vanhornia eucnemidarum Crawford, 1909	Animalia	Arthropoda	Insecta	Hymenoptera	Vanhorniidae	Vanhornia	species	Crawford 1909	North America	United States	US	Virginia	VA.: Fairfax Co. near Annandale			WGS84	Malaise Trap	1989-07-01	1989	07	01		CNCI	PreservedSpecimen
Other material	UCFC:Veuc:00000092	CNC1194408	David R. Smith		adult	Vanhornia eucnemidarum Crawford, 1909	Animalia	Arthropoda	Insecta	Hymenoptera	Vanhorniidae	Vanhornia	species	Crawford 1909	North America	United States	US	Virginia	VA.: Fairfax Co. near Annandale			WGS84	Malaise Trap	1989-06-03	1989	06	03		CNCI	PreservedSpecimen
Other material	UCFC:Veuc:00000093	CNC1194354	D.R. Smith		adult	Vanhornia eucnemidarum Crawford, 1909	Animalia	Arthropoda	Insecta	Hymenoptera	Vanhorniidae	Vanhornia	species	Crawford 1909	North America	United States	US	Virginia	VA: Fairfax G. nr. Annandale			WGS84	Malaise Trap	1986-05-25/31	1986	05	25/31		CNCI	PreservedSpecimen
Other material	UCFC:Veuc:00000094	CNC1194415	D.R. Smith		adult	Vanhornia eucnemidarum Crawford, 1909	Animalia	Arthropoda	Insecta	Hymenoptera	Vanhorniidae	Vanhornia	species	Crawford 1909	North America	United States	US	Virginia	VA: Fairfax G. nr. Annandale			WGS84	Malaise Trap	1986-05-25/31	1986	05	25/31		CNCI	PreservedSpecimen
Other material	UCFC:Veuc:00000095	CNC1194416	D.R. Smith		adult	Vanhornia eucnemidarum Crawford, 1909	Animalia	Arthropoda	Insecta	Hymenoptera	Vanhorniidae	Vanhornia	species	Crawford 1909	North America	United States	US	Virginia	VA: Fairfax G. nr. Annandale			WGS84	Malaise Trap	1986-05-25/31	1986	05	25/31		CNCI	PreservedSpecimen
Other material	UCFC:Veuc:00000096	CNC1194380	J. Kloke & D.R. Smith		adult	Vanhornia eucnemidarum Crawford, 1909	Animalia	Arthropoda	Insecta	Hymenoptera	Vanhorniidae	Vanhornia	species	Crawford 1909	North America	United States	US	Virginia	Virginia: Louisa Co. 4 mi. S Cuckoo			WGS84	Malaise Trap	1988-05/06-27/07	1988	05/06	27/07		CNCI	PreservedSpecimen
Other material	UCFC:Veuc:00000097	CNC1194397	J. Kloke & D.R. Smith		adult	Vanhornia eucnemidarum Crawford, 1909	Animalia	Arthropoda	Insecta	Hymenoptera	Vanhorniidae	Vanhornia	species	Crawford 1909	North America	United States	US	Virginia	Virginia: Louisa Co. 4 mi. S Cuckoo			WGS84	Malaise Trap	1989-06-08/19	1989	06	08/19		CNCI	PreservedSpecimen
Other material	UCFC:Veuc:00000098	CNC1194398	J. Kloke & D.R. Smith		adult	Vanhornia eucnemidarum Crawford, 1909	Animalia	Arthropoda	Insecta	Hymenoptera	Vanhorniidae	Vanhornia	species	Crawford 1909	North America	United States	US	Virginia	Virginia: Louisa Co. 4 mi. S Cuckoo			WGS84	Malaise Trap	1989-05/06-27/07	1989	05/06	27/07		CNCI	PreservedSpecimen
Other material	UCFC:Veuc:00000099	CNC1194401	J. Kloke & D.R. Smith		adult	Vanhornia eucnemidarum Crawford, 1909	Animalia	Arthropoda	Insecta	Hymenoptera	Vanhorniidae	Vanhornia	species	Crawford 1909	North America	United States	US	Virginia	Virginia: Louisa Co. 4 mi. S Cuckoo			WGS84	Malaise Trap	1989-06-08/19	1989	06	08/19		CNCI	PreservedSpecimen
Other material	UCFC:Veuc:00000100	CNC1194402	J. Kloke & D.R. Smith		adult	Vanhornia eucnemidarum Crawford, 1909	Animalia	Arthropoda	Insecta	Hymenoptera	Vanhorniidae	Vanhornia	species	Crawford 1909	North America	United States	US	Virginia	Virginia: Louisa Co. 4 mi. S Cuckoo			WGS84	Malaise Trap	1989-07-04/18	1989	07	04/18		CNCI	PreservedSpecimen
Other material	UCFC:Veuc:00000101	CNC1194404	J. Kloke & D.R. Smith		adult	Vanhornia eucnemidarum Crawford, 1909	Animalia	Arthropoda	Insecta	Hymenoptera	Vanhorniidae	Vanhornia	species	Crawford 1909	North America	United States	US	Virginia	Virginia: Louisa Co. 4 mi. S Cuckoo			WGS84	Malaise Trap	1988-05/06-27/07	1988	05/06	27/07		CNCI	PreservedSpecimen
Other material	UCFC:Veuc:00000102	CNC1194405	J. Kloke & D.R. Smith		adult	Vanhornia eucnemidarum Crawford, 1909	Animalia	Arthropoda	Insecta	Hymenoptera	Vanhorniidae	Vanhornia	species	Crawford 1909	North America	United States	US	Virginia	Virginia: Louisa Co. 4 mi. S Cuckoo			WGS84	Malaise Trap	1988-05/06-27/07	1988	05/06	27/07		CNCI	PreservedSpecimen
Other material	UCFC:Veuc:00000103	CNC1194406	J. Kloke & D.R. Smith		adult	Vanhornia eucnemidarum Crawford, 1909	Animalia	Arthropoda	Insecta	Hymenoptera	Vanhorniidae	Vanhornia	species	Crawford 1909	North America	United States	US	Virginia	Virginia: Louisa Co. 4 mi. S Cuckoo			WGS84	Malaise Trap	1988-05/06-27/07	1988	05/06	27/07		CNCI	PreservedSpecimen
Other material	UCFC:Veuc:00000104	CNC1194409	J. Kloke & D.R. Smith		adult	Vanhornia eucnemidarum Crawford, 1909	Animalia	Arthropoda	Insecta	Hymenoptera	Vanhorniidae	Vanhornia	species	Crawford 1909	North America	United States	US	Virginia	Virginia: Louisa Co. 4 mi. S Cuckoo			WGS84	Malaise Trap	1988-05/06-27/07	1988	05/06	27/07		CNCI	PreservedSpecimen
Other material	UCFC:Veuc:00000105			female	adult	Vanhornia eucnemidarum Crawford, 1909	Animalia	Arthropoda	Insecta	Hymenoptera	Vanhorniidae	Vanhornia	species	Crawford 1909	North America	Canada	CA	Ontario	Aylmer West			WGS84	Malaise Trap	1972-08-28	1972	08	28		DEBU	PreservedSpecimen
Other material	UCFC:Veuc:00000106			male	adult	Vanhornia eucnemidarum Crawford, 1909	Animalia	Arthropoda	Insecta	Hymenoptera	Vanhorniidae	Vanhornia	species	Crawford 1909	North America	Canada	CA	Ontario	Glen Orchy Conservation Area Halton Reg	43.4661	-79.783	WGS84	none specified	2018-07-08	2018	07	08		DEBU	PreservedSpecimen
Other material	UCFC:Veuc:00000107			male	adult	Vanhornia eucnemidarum Crawford, 1909	Animalia	Arthropoda	Insecta	Hymenoptera	Vanhorniidae	Vanhornia	species	Crawford 1909	North America	Canada	CA	Ontario	Glen Orchy Conservation Area Halton Reg	43.4661	-79.783	WGS84	none specified	2018-07-08	2018	07	08		DEBU	PreservedSpecimen
Other material	UCFC:Veuc:00000108			male	adult	Vanhornia eucnemidarum Crawford, 1909	Animalia	Arthropoda	Insecta	Hymenoptera	Vanhorniidae	Vanhornia	species	Crawford 1909	North America	Canada	CA	Ontario	Glen Orchy Conservation Area Halton Reg	43.4661	-79.783	WGS84	none specified	2018-07-08	2018	07	08		DEBU	PreservedSpecimen
Other material	UCFC:Veuc:00000109			male	adult	Vanhornia eucnemidarum Crawford, 1909	Animalia	Arthropoda	Insecta	Hymenoptera	Vanhorniidae	Vanhornia	species	Crawford 1909	North America	Canada	CA	Ontario	Glen Orchy Conservation Area Halton Reg	43.4661	-79.783	WGS84	none specified	2018-07-08	2018	07	08		DEBU	PreservedSpecimen
Other material	UCFC:Veuc:00000110			female	adult	Vanhornia eucnemidarum Crawford, 1909	Animalia	Arthropoda	Insecta	Hymenoptera	Vanhorniidae	Vanhornia	species	Crawford 1909	North America	Canada	CA	Ontario	Guelph			WGS84	Pan Trap	1980-07-18/26	1980	07	18/26		DEBU	PreservedSpecimen
Other material	UCFC:Veuc:00000111	DEBU00314870		female	adult	Vanhornia eucnemidarum Crawford, 1909	Animalia	Arthropoda	Insecta	Hymenoptera	Vanhorniidae	Vanhornia	species	Crawford 1909	North America	Canada	CA	Ontario	Hald.-Norfolk Reg., Charlotteville 2 Rd., 2.9 km NE of Turkey Point Rd	42.7353	-80.3244	WGS84	Trap Tree	2009-07/08-24/01	2009	07/08	24/01		DEBU	PreservedSpecimen
Other material	UCFC:Veuc:00000112			female	adult	Vanhornia eucnemidarum Crawford, 1909	Animalia	Arthropoda	Insecta	Hymenoptera	Vanhorniidae	Vanhornia	species	Crawford 1909	North America	Canada	CA	Ontario	Hamilton			WGS84	none specified	1982-07-22	1982	07	22		DEBU	PreservedSpecimen
Other material	UCFC:Veuc:00000113			female	adult	Vanhornia eucnemidarum Crawford, 1909	Animalia	Arthropoda	Insecta	Hymenoptera	Vanhorniidae	Vanhornia	species	Crawford 1909	North America	Canada	CA	Ontario	Rondeau Provincial Park, Spicebush Trail			WGS84	none specified	1985-06-26	1985	06	26		DEBU	PreservedSpecimen
Other material	UCFC:Veuc:00000114	DEBU01144020		female	adult	Vanhornia eucnemidarum Crawford, 1909	Animalia	Arthropoda	Insecta	Hymenoptera	Vanhorniidae	Vanhornia	species	Crawford 1909	North America	United States	US	Maryland	Whitemarsh Park, Bowie Prince George's Co.			WGS84	none specified	2008-06-21	2008	06	21		DEBU	PreservedSpecimen
Other material	UCFC:Veuc:00000115	FSCA 00033039	Porter, C.		adult	Vanhornia eucnemidarum Crawford, 1909	Animalia	Arthropoda	Insecta	Hymenoptera	Vanhorniidae	Vanhornia	species	Crawford 1909	North America	United States	US	New Jersey	Metuchen			WGS84	none specified	1964-06-12	1964	06	12		FSCA	PreservedSpecimen
Other material	UCFC:Veuc:00000116	FSCA 00033035	Porter, C. C. (Charles C.)		adult	Vanhornia eucnemidarum Crawford, 1909	Animalia	Arthropoda	Insecta	Hymenoptera	Vanhorniidae	Vanhornia	species	Crawford 1909	North America	United States	US	New Jersey	Metuchen Middlesex Co.			WGS84	none specified	1964-06	1964	06			FSCA	PreservedSpecimen
Other material	UCFC:Veuc:00000117	FSCA 00033036	Porter, C. C. (Charles C.)		adult	Vanhornia eucnemidarum Crawford, 1909	Animalia	Arthropoda	Insecta	Hymenoptera	Vanhorniidae	Vanhornia	species	Crawford 1909	North America	United States	US	New Jersey	Metuchen Middlesex Co.			WGS84	none specified	1964-06	1964	06			FSCA	PreservedSpecimen
Other material	UCFC:Veuc:00000118	FSCA 00033037	Porter, C. C. (Charles C.)		adult	Vanhornia eucnemidarum Crawford, 1909	Animalia	Arthropoda	Insecta	Hymenoptera	Vanhorniidae	Vanhornia	species	Crawford 1909	North America	United States	US	New Jersey	Metuchen Middlesex Co.			WGS84	none specified	1964-06	1964	06			FSCA	PreservedSpecimen
Other material	UCFC:Veuc:00000119	FSCA 00033051	Porter, C. C. (Charles C.)		adult	Vanhornia eucnemidarum Crawford, 1909	Animalia	Arthropoda	Insecta	Hymenoptera	Vanhorniidae	Vanhornia	species	Crawford 1909	North America	United States	US	New Jersey	Woodwild Park Metuchen Middlesex Co.			WGS84	none specified	1959-06	1959	06			FSCA	PreservedSpecimen
Other material	UCFC:Veuc:00000120	FSCA 00033052	Porter, C. C. (Charles C.)		adult	Vanhornia eucnemidarum Crawford, 1909	Animalia	Arthropoda	Insecta	Hymenoptera	Vanhorniidae	Vanhornia	species	Crawford 1909	North America	United States	US	New Jersey	Woodwild Park Metuchen Middlesex Co.			WGS84	none specified	1959-06	1959	06			FSCA	PreservedSpecimen
Other material	UCFC:Veuc:00000121	FSCA 00033053	Porter, C. C. (Charles C.)		adult	Vanhornia eucnemidarum Crawford, 1909	Animalia	Arthropoda	Insecta	Hymenoptera	Vanhorniidae	Vanhornia	species	Crawford 1909	North America	United States	US	New Jersey	Woodwild Park Metuchen Middlesex Co.			WGS84	none specified	1959-06	1959	06			FSCA	PreservedSpecimen
Other material	UCFC:Veuc:00000122	FSCA 00033054	Porter, C. C. (Charles C.)		adult	Vanhornia eucnemidarum Crawford, 1909	Animalia	Arthropoda	Insecta	Hymenoptera	Vanhorniidae	Vanhornia	species	Crawford 1909	North America	United States	US	New Jersey	Woodwild Park Metuchen Middlesex Co.			WGS84	none specified	1959-06	1959	06			FSCA	PreservedSpecimen
Other material	UCFC:Veuc:00000123	FSCA 00033055	Porter, C. C. (Charles C.)		adult	Vanhornia eucnemidarum Crawford, 1909	Animalia	Arthropoda	Insecta	Hymenoptera	Vanhorniidae	Vanhornia	species	Crawford 1909	North America	United States	US	New Jersey	Woodwild Park Metuchen Middlesex Co.			WGS84	none specified	1959-06	1959	06			FSCA	PreservedSpecimen
Other material	UCFC:Veuc:00000124	FSCA 00033056	Porter, C. C. (Charles C.)		adult	Vanhornia eucnemidarum Crawford, 1909	Animalia	Arthropoda	Insecta	Hymenoptera	Vanhorniidae	Vanhornia	species	Crawford 1909	North America	United States	US	New Jersey	Woodwild Park Metuchen Middlesex Co.			WGS84	none specified	1959-06	1959	06			FSCA	PreservedSpecimen
Other material	UCFC:Veuc:00000125	FSCA 00033057	Porter, C. C. (Charles C.)		adult	Vanhornia eucnemidarum Crawford, 1909	Animalia	Arthropoda	Insecta	Hymenoptera	Vanhorniidae	Vanhornia	species	Crawford 1909	North America	United States	US	New Jersey	Woodwild Park Metuchen Middlesex Co.			WGS84	none specified	1956-06	1956	06			FSCA	PreservedSpecimen
Other material	UCFC:Veuc:00000126	FSCA 00033058	Porter, C. C. (Charles C.)		adult	Vanhornia eucnemidarum Crawford, 1909	Animalia	Arthropoda	Insecta	Hymenoptera	Vanhorniidae	Vanhornia	species	Crawford 1909	North America	United States	US	New Jersey	Woodwild Park Metuchen Middlesex Co.			WGS84	none specified	1956-06	1956	06			FSCA	PreservedSpecimen
Other material	UCFC:Veuc:00000127	FSCA 00033059	Porter, C. C. (Charles C.)		adult	Vanhornia eucnemidarum Crawford, 1909	Animalia	Arthropoda	Insecta	Hymenoptera	Vanhorniidae	Vanhornia	species	Crawford 1909	North America	United States	US	New Jersey	Woodwild Park Metuchen Middlesex Co.			WGS84	none specified	1956-06	1956	06			FSCA	PreservedSpecimen
Other material	UCFC:Veuc:00000128	FSCA 00033034	Porter, C. C. (Charles C.)		adult	Vanhornia eucnemidarum Crawford, 1909	Animalia	Arthropoda	Insecta	Hymenoptera	Vanhorniidae	Vanhornia	species	Crawford 1909	North America	United States	US	New Jersey	Woodwild Park Metuchen Middlesex Co.			WGS84	none specified	1956-06	1956	06			FSCA	PreservedSpecimen
Other material	UCFC:Veuc:00000129	FSCA 00033038	Porter, C. C. (Charles C.)		adult	Vanhornia eucnemidarum Crawford, 1909	Animalia	Arthropoda	Insecta	Hymenoptera	Vanhorniidae	Vanhornia	species	Crawford 1909	North America	United States	US	New Jersey	Woodwild Park Metuchen Middlesex Co.			WGS84	none specified	1959-07	1959	07			FSCA	PreservedSpecimen
Other material	UCFC:Veuc:00000130	FSCA 00033047	Porter, C.		adult	Vanhornia eucnemidarum Crawford, 1909	Animalia	Arthropoda	Insecta	Hymenoptera	Vanhorniidae	Vanhornia	species	Crawford 1909	North America	United States	US	New Jersey	Woodwild Pk. Metuchen			WGS84	none specified	1959-06-10	1959	06	10		FSCA	PreservedSpecimen
Other material	UCFC:Veuc:00000131	FSCA 00033048	Porter, C.		adult	Vanhornia eucnemidarum Crawford, 1909	Animalia	Arthropoda	Insecta	Hymenoptera	Vanhorniidae	Vanhornia	species	Crawford 1909	North America	United States	US	New Jersey	Woodwild Pk. Metuchen			WGS84	none specified	1959-06-22	1959	06	22		FSCA	PreservedSpecimen
Other material	UCFC:Veuc:00000132	FSCA 00033049	Porter, C.		adult	Vanhornia eucnemidarum Crawford, 1909	Animalia	Arthropoda	Insecta	Hymenoptera	Vanhorniidae	Vanhornia	species	Crawford 1909	North America	United States	US	New Jersey	Woodwild Pk. Metuchen			WGS84	none specified	1959-06-12	1959	06	12		FSCA	PreservedSpecimen
Other material	UCFC:Veuc:00000133	FSCA 00033050	Porter, C.		adult	Vanhornia eucnemidarum Crawford, 1909	Animalia	Arthropoda	Insecta	Hymenoptera	Vanhorniidae	Vanhornia	species	Crawford 1909	North America	United States	US	New Jersey	Woodwild Pk. Metuchen			WGS84	none specified	1959-06-11	1959	06	11		FSCA	PreservedSpecimen
Other material	UCFC:Veuc:00000134				adult	Vanhornia eucnemidarum Crawford, 1909	Animalia	Arthropoda	Insecta	Hymenoptera	Vanhorniidae	Vanhornia	species	Crawford 1909	North America	United States	US	Kentucky	Nr Frenchburg On Hydrocut (south Side) Menifee Co.			WGS84	none specified	1997-07-03	1997	07	03		HIC	PreservedSpecimen
Other material	UCFC:Veuc:00000135				adult	Vanhornia eucnemidarum Crawford, 1909	Animalia	Arthropoda	Insecta	Hymenoptera	Vanhorniidae	Vanhornia	species	Crawford 1909	North America	United States	US	Kentucky	Nr Frenchburg On Hydrocut (south Side) Menifee Co.			WGS84	none specified	1997-07-02	1997	07	02		HIC	PreservedSpecimen
Other material	UCFC:Veuc:00000136	Entomology 678934			adult	Vanhornia eucnemidarum Crawford, 1909	Animalia	Arthropoda	Insecta	Hymenoptera	Vanhorniidae	Vanhornia	species	Crawford 1909	North America	United States	US	Maine	Brewer			WGS84	none specified						MCZC	PreservedSpecimen
Other material	UCFC:Veuc:00000137	Entomology 678933			adult	Vanhornia eucnemidarum Crawford, 1909	Animalia	Arthropoda	Insecta	Hymenoptera	Vanhorniidae	Vanhornia	species	Crawford 1909	North America	United States	US	Maine	Hancock			WGS84	none specified						MCZC	PreservedSpecimen
Other material	UCFC:Veuc:00000138	Entomology 678935			adult	Vanhornia eucnemidarum Crawford, 1909	Animalia	Arthropoda	Insecta	Hymenoptera	Vanhorniidae	Vanhornia	species	Crawford 1909	North America	United States	US	Maryland	Cabin John Md.	38.9696	-77.1764	WGS84	none specified	1960-06-21	1960	06	21		MCZC	PreservedSpecimen
Other material	UCFC:Veuc:00000139	Entomology 678939			adult	Vanhornia eucnemidarum Crawford, 1909	Animalia	Arthropoda	Insecta	Hymenoptera	Vanhorniidae	Vanhornia	species	Crawford 1909	North America	United States	US	Maryland	MD P. G. Co. College Park	38.9897	-76.9378	WGS84	none specified	1981-06-21	1981	06	21		MCZC	PreservedSpecimen
Other material	UCFC:Veuc:00000140	Entomology 678940			adult	Vanhornia eucnemidarum Crawford, 1909	Animalia	Arthropoda	Insecta	Hymenoptera	Vanhorniidae	Vanhornia	species	Crawford 1909	North America	United States	US	Maryland	MD P. G. Co. College Park	38.9897	-76.9378	WGS84	none specified	1981-06-21	1981	06	21		MCZC	PreservedSpecimen
Other material	UCFC:Veuc:00000141	Entomology 678936			adult	Vanhornia eucnemidarum Crawford, 1909	Animalia	Arthropoda	Insecta	Hymenoptera	Vanhorniidae	Vanhornia	species	Crawford 1909	North America	United States	US	Maryland	Plummers Is	38.9754	-77.158	WGS84	none specified	1916-10	1916	10			MCZC	PreservedSpecimen
Other material	UCFC:Veuc:00000142	Entomology 678924			adult	Vanhornia eucnemidarum Crawford, 1909	Animalia	Arthropoda	Insecta	Hymenoptera	Vanhorniidae	Vanhornia	species	Crawford 1909	North America	United States	US	Massachusetts	Petersham			WGS84	none specified	1913-07	1913	07			MCZC	PreservedSpecimen
Other material	UCFC:Veuc:00000143	Entomology 678927			adult	Vanhornia eucnemidarum Crawford, 1909	Animalia	Arthropoda	Insecta	Hymenoptera	Vanhorniidae	Vanhornia	species	Crawford 1909	North America	United States	US	Massachusetts	Petersham			WGS84	none specified						MCZC	PreservedSpecimen
Other material	UCFC:Veuc:00000144	Entomology 678922			adult	Vanhornia eucnemidarum Crawford, 1909	Animalia	Arthropoda	Insecta	Hymenoptera	Vanhorniidae	Vanhornia	species	Crawford 1909	North America	United States	US	Massachusetts	Petersham			WGS84	none specified	1913-07	1913	07			MCZC	PreservedSpecimen
Other material	UCFC:Veuc:00000145	Entomology 678925			adult	Vanhornia eucnemidarum Crawford, 1909	Animalia	Arthropoda	Insecta	Hymenoptera	Vanhorniidae	Vanhornia	species	Crawford 1909	North America	United States	US	Massachusetts	Petersham			WGS84	none specified	1919-07	1919	07			MCZC	PreservedSpecimen
Other material	UCFC:Veuc:00000146	Entomology 678926			adult	Vanhornia eucnemidarum Crawford, 1909	Animalia	Arthropoda	Insecta	Hymenoptera	Vanhorniidae	Vanhornia	species	Crawford 1909	North America	United States	US	Massachusetts	Petersham			WGS84	none specified	1913-07	1913	07			MCZC	PreservedSpecimen
Other material	UCFC:Veuc:00000147	Entomology 678929			adult	Vanhornia eucnemidarum Crawford, 1909	Animalia	Arthropoda	Insecta	Hymenoptera	Vanhorniidae	Vanhornia	species	Crawford 1909	North America	United States	US	Massachusetts	Petersham			WGS84	none specified						MCZC	PreservedSpecimen
Other material	UCFC:Veuc:00000148	Entomology 678928			adult	Vanhornia eucnemidarum Crawford, 1909	Animalia	Arthropoda	Insecta	Hymenoptera	Vanhorniidae	Vanhornia	species	Crawford 1909	North America	United States	US	Massachusetts	Petersham			WGS84	none specified	1920-07	1920	07			MCZC	PreservedSpecimen
Other material	UCFC:Veuc:00000149	Entomology 678921			adult	Vanhornia eucnemidarum Crawford, 1909	Animalia	Arthropoda	Insecta	Hymenoptera	Vanhorniidae	Vanhornia	species	Crawford 1909	North America	United States	US	Massachusetts	Petersham			WGS84	none specified						MCZC	PreservedSpecimen
Other material	UCFC:Veuc:00000150	Entomology 678930			adult	Vanhornia eucnemidarum Crawford, 1909	Animalia	Arthropoda	Insecta	Hymenoptera	Vanhorniidae	Vanhornia	species	Crawford 1909	North America	United States	US	Massachusetts	Petersham			WGS84	none specified	1921-09	1921	09			MCZC	PreservedSpecimen
Other material	UCFC:Veuc:00000151	Entomology 678931			adult	Vanhornia eucnemidarum Crawford, 1909	Animalia	Arthropoda	Insecta	Hymenoptera	Vanhorniidae	Vanhornia	species	Crawford 1909	North America	United States	US	Massachusetts	Petersham			WGS84	none specified	1917-07	1917	07			MCZC	PreservedSpecimen
Other material	UCFC:Veuc:00000152	Entomology 678937			adult	Vanhornia eucnemidarum Crawford, 1909	Animalia	Arthropoda	Insecta	Hymenoptera	Vanhorniidae	Vanhornia	species	Crawford 1909	North America	United States	US	Massachusetts	Petersham			WGS84	none specified	1918-07	1918	07			MCZC	PreservedSpecimen
Other material	UCFC:Veuc:00000153	Entomology 678923			adult	Vanhornia eucnemidarum Crawford, 1909	Animalia	Arthropoda	Insecta	Hymenoptera	Vanhorniidae	Vanhornia	species	Crawford 1909	North America	United States	US	Massachusetts	Petersham			WGS84	none specified						MCZC	PreservedSpecimen
Other material	UCFC:Veuc:00000154	Entomology 678932			adult	Vanhornia eucnemidarum Crawford, 1909	Animalia	Arthropoda	Insecta	Hymenoptera	Vanhorniidae	Vanhornia	species	Crawford 1909	North America	United States	US	New York	6-Mile Creek Ithaca			WGS84	none specified	1957-07-08	1957	07	08		MCZC	PreservedSpecimen
Other material	UCFC:Veuc:00000155		N.M. Schiff		adult	Vanhornia eucnemidarum Crawford, 1909	Animalia	Arthropoda	Insecta	Hymenoptera	Vanhorniidae	Vanhornia	species	Crawford 1909	North America	United States	US	Mississippi	12.2 m W of Boyle Bolivar Co.	33.7033	-90.9297	WGS84	Malaise Trap	1997-06/07-24/06	1997	06/07	24/06	Bottomland Hardwood Forest	MEM	PreservedSpecimen
Other material	UCFC:Veuc:00000156		T.A. Bowling		adult	Vanhornia eucnemidarum Crawford, 1909	Animalia	Arthropoda	Insecta	Hymenoptera	Vanhorniidae	Vanhornia	species	Crawford 1909	North America	United States	US	Michigan	Branch Lake Co.			WGS84	Malaise Trap	1974-07-06/08	1974	07	06/08		MSUC	PreservedSpecimen
Other material	UCFC:Veuc:00000157				adult	Vanhornia eucnemidarum Crawford, 1909	Animalia	Arthropoda	Insecta	Hymenoptera	Vanhorniidae	Vanhornia	species	Crawford 1909	North America	United States	US	Michigan	East Lansing Ingham Co.			WGS84	none specified	1897-07-13	1897	07	13		MSUC	PreservedSpecimen
Other material	UCFC:Veuc:00000158		James. G. Trucha		adult	Vanhornia eucnemidarum Crawford, 1909	Animalia	Arthropoda	Insecta	Hymenoptera	Vanhorniidae	Vanhornia	species	Crawford 1909	North America	United States	US	Michigan	St. Charles Saginaw Co.			WGS84	Rotary Trap	1968-07-08	1968	07	08		MSUC	PreservedSpecimen
Other material	UCFC:Veuc:00000159		James. G. Trucha		adult	Vanhornia eucnemidarum Crawford, 1909	Animalia	Arthropoda	Insecta	Hymenoptera	Vanhorniidae	Vanhornia	species	Crawford 1909	North America	United States	US	Michigan	St. Charles Saginaw Co.			WGS84	Rotary Trap	1968-07-15	1968	07	15		MSUC	PreservedSpecimen
Other material	UCFC:Veuc:00000160		James. G. Trucha		adult	Vanhornia eucnemidarum Crawford, 1909	Animalia	Arthropoda	Insecta	Hymenoptera	Vanhorniidae	Vanhornia	species	Crawford 1909	North America	United States	US	Michigan	St. Charles Saginaw Co.			WGS84	Rotary Trap	1968-07-26	1968	07	26		MSUC	PreservedSpecimen
Other material	UCFC:Veuc:00000161	NCSU 46822	BRC Hym Team MT		adult	Vanhornia eucnemidarum Crawford, 1909	Animalia	Arthropoda	Insecta	Hymenoptera	Vanhorniidae	Vanhornia	species	Crawford 1909	North America	Canada	CA	Quebec	Eardley Jct Hwy 148 & Eardley Masham Rd	45.552	-76.099	WGS84	none specified	1991-07-11/20	1991	07	11/20		NCSU	PreservedSpecimen
Other material	UCFC:Veuc:00000162	NCSU 46821	E. Younan		adult	Vanhornia eucnemidarum Crawford, 1909	Animalia	Arthropoda	Insecta	Hymenoptera	Vanhorniidae	Vanhornia	species	Crawford 1909	North America	United States	US	North Carolina	DHHill For Durham Co.	35.937	-78.998	WGS84	none specified	1976-06/07-26/12	1976	06/07	26/12		NCSU	PreservedSpecimen
Other material	UCFC:Veuc:00000163	NCSU 46820	E. Younan		adult	Vanhornia eucnemidarum Crawford, 1909	Animalia	Arthropoda	Insecta	Hymenoptera	Vanhorniidae	Vanhornia	species	Crawford 1909	North America	United States	US	North Carolina	Hill Forest 1 mi NNW Bahama Durham Co.	36.17	-78.889	WGS84	none specified	1976-07-13	1976	07	13		NCSU	PreservedSpecimen
Other material	UCFC:Veuc:00000164	NCSU 46824	David R Smith		adult	Vanhornia eucnemidarum Crawford, 1909	Animalia	Arthropoda	Insecta	Hymenoptera	Vanhorniidae	Vanhornia	species	Crawford 1909	North America	United States	US	Virginia	near Annadale Fairfax Co.	38.83	-77.196	WGS84	none specified	1990-07-01/07	1990	07	01/07		NCSU	PreservedSpecimen
Other material	UCFC:Veuc:00000165	NCSU 46823	David R Smith		adult	Vanhornia eucnemidarum Crawford, 1909	Animalia	Arthropoda	Insecta	Hymenoptera	Vanhorniidae	Vanhornia	species	Crawford 1909	North America	United States	US	Virginia	near Annadale Fairfax Co.	38.8333	-77.2	WGS84	none specified	1997-06-15/21	1997	06	15/21		NCSU	PreservedSpecimen
Other material	UCFC:Veuc:00000166				adult	Vanhornia eucnemidarum Crawford, 1909	Animalia	Arthropoda	Insecta	Hymenoptera	Vanhorniidae	Vanhornia	species	Crawford 1909	North America	United States	US	West Virginia	3 Mi Ne Mathias Hardy Co.			WGS84	none specified	2001-04-30	2001	04	30		NMNH	PreservedSpecimen
Other material	UCFC:Veuc:00000167				adult	Vanhornia eucnemidarum Crawford, 1909	Animalia	Arthropoda	Insecta	Hymenoptera	Vanhorniidae	Vanhornia	species	Crawford 1909	North America	United States	US	Maryland	Prince George's Co.	39.04	-76.92	WGS84	none specified	1991-05/06-24/03	1991	05/06	24/03		OSUC	PreservedSpecimen
Other material	UCFC:Veuc:00000168	OSUC 16902			adult	Vanhornia eucnemidarum Crawford, 1909	Animalia	Arthropoda	Insecta	Hymenoptera	Vanhorniidae	Vanhornia	species	Crawford 1909	North America	United States	US	North Carolina	Raleigh Wake Co.	35.7719	-78.6389	WGS84	none specified	1982-06-23/25	1982	06	23/25		OSUC	PreservedSpecimen
Other material	UCFC:Veuc:00000169	OSUC 199306			adult	Vanhornia eucnemidarum Crawford, 1909	Animalia	Arthropoda	Insecta	Hymenoptera	Vanhorniidae	Vanhornia	species	Crawford 1909	North America	United States	US	Ohio	Delaware Co.	40.2667	-83.0003	WGS84	none specified	1945	1945				OSUC	PreservedSpecimen	Some specimens in this group reared
Other material	UCFC:Veuc:00000170				adult	Vanhornia eucnemidarum Crawford, 1909	Animalia	Arthropoda	Insecta	Hymenoptera	Vanhorniidae	Vanhornia	species	Crawford 1909	North America	United States	US	Virginia	Fairfax	38.8333	-77.2	WGS84	none specified	1988-06-11	1988	06	11		OSUC	PreservedSpecimen
Other material	UCFC:Veuc:00000171		M. Sanborne		adult	Vanhornia eucnemidarum Crawford, 1909	Animalia	Arthropoda	Insecta	Hymenoptera	Vanhorniidae	Vanhornia	species	Crawford 1909	North America	Canada	CA	Ontario	Constance Bay			WGS84	none specified	1979-07-05/08	1979	07	05/08		PMAE	PreservedSpecimen
Other material	UCFC:Veuc:00000172				adult	Vanhornia eucnemidarum Crawford, 1909	Animalia	Arthropoda	Insecta	Hymenoptera	Vanhorniidae	Vanhornia	species	Crawford 1909	North America	United States	US	Pennsylvania	Petersham Worcester			WGS84	none specified	1991-07	1991	07			PMNH	PreservedSpecimen
Other material	UCFC:Veuc:00000173		Joseph Ouellet		adult	Vanhornia eucnemidarum Crawford, 1909	Animalia	Arthropoda	Insecta	Hymenoptera	Vanhorniidae	Vanhornia	species	Crawford 1909	North America	Canada	CA	Quebec	La Trappe (Oka)			WGS84	none specified	1948-08-18	1948	08	18		QMOR	PreservedSpecimen
Other material	UCFC:Veuc:00000174		Joseph Ouellet		adult	Vanhornia eucnemidarum Crawford, 1909	Animalia	Arthropoda	Insecta	Hymenoptera	Vanhorniidae	Vanhornia	species	Crawford 1909	North America	Canada	CA	Quebec	La Trappe (Oka)			WGS84	none specified	1950-08-06	1950	08	06		QMOR	PreservedSpecimen
Other material	UCFC:Veuc:00000175		P. Thomas and David R. Smith		adult	Vanhornia eucnemidarum Crawford, 1909	Animalia	Arthropoda	Insecta	Hymenoptera	Vanhorniidae	Vanhornia	species	Crawford 1909	North America	United States	US	Virginia	Annandale, Fairfax Co.			WGS84	Malaise Trap	1987-06-06	1987	06	06		RMNH	PreservedSpecimen
Other material	UCFC:Veuc:00000176				adult	Vanhornia eucnemidarum Crawford, 1909	Animalia	Arthropoda	Insecta	Hymenoptera	Vanhorniidae	Vanhornia	species	Crawford 1909	North America	Canada	CA	Ontario	Joker's Hill, NW of Newmarket York Region			WGS84	none specified	1997-06/07-27/04	1997	06/07	27/04		ROME	PreservedSpecimen
Other material	UCFC:Veuc:00000177				adult	Vanhornia eucnemidarum Crawford, 1909	Animalia	Arthropoda	Insecta	Hymenoptera	Vanhorniidae	Vanhornia	species	Crawford 1909	North America	Canada	CA	Ontario	Joker's Hill, NW of Newmarket York Region			WGS84	none specified	1997-06/07-27/04	1997	06/07	27/04		ROME	PreservedSpecimen
Other material	UCFC:Veuc:00000178				adult	Vanhornia eucnemidarum Crawford, 1909	Animalia	Arthropoda	Insecta	Hymenoptera	Vanhorniidae	Vanhornia	species	Crawford 1909	North America	Canada	CA	Ontario	Joker's Hill, NW of Newmarket York Region			WGS84	none specified	1997-07-05/27	1997	07	05/27		ROME	PreservedSpecimen
Other material	UCFC:Veuc:00000179				adult	Vanhornia eucnemidarum Crawford, 1909	Animalia	Arthropoda	Insecta	Hymenoptera	Vanhorniidae	Vanhornia	species	Crawford 1909	North America	Canada	CA	Ontario	Joker's Hill, NW of Newmarket York Region			WGS84	none specified	1997-07-05/27	1997	07	05/27		ROME	PreservedSpecimen
Other material	UCFC:Veuc:00000180				adult	Vanhornia eucnemidarum Crawford, 1909	Animalia	Arthropoda	Insecta	Hymenoptera	Vanhorniidae	Vanhornia	species	Crawford 1909	North America	Canada	CA	Ontario	Joker's Hill, NW of Newmarket York Region			WGS84	none specified	1997-07-05/27	1997	07	05/27		ROME	PreservedSpecimen
Other material	UCFC:Veuc:00000181				adult	Vanhornia eucnemidarum Crawford, 1909	Animalia	Arthropoda	Insecta	Hymenoptera	Vanhorniidae	Vanhornia	species	Crawford 1909	North America	Canada	CA	Ontario	Pinery Provincial Park Lambton Co.	43.2667	-81.8333	WGS84	none specified	1986-07-12/28	1986	07	12/28		ROME	PreservedSpecimen
Other material	UCFC:Veuc:00000182				adult	Vanhornia eucnemidarum Crawford, 1909	Animalia	Arthropoda	Insecta	Hymenoptera	Vanhorniidae	Vanhornia	species	Crawford 1909	North America	United States	US	Connecticut	Roxbury Litchfield Co.			WGS84	none specified	1990-07-07/09	1990	07	07/09		ROME	PreservedSpecimen
Other material	UCFC:Veuc:00000183				adult	Vanhornia eucnemidarum Crawford, 1909	Animalia	Arthropoda	Insecta	Hymenoptera	Vanhorniidae	Vanhornia	species	Crawford 1909	North America	United States	US	New York	6-Mile Creek Ithaca			WGS84	none specified	1937-07-02	1937	07	02		ROME	PreservedSpecimen
Other material	UCFC:Veuc:00000184		B. DeJonge		adult	Vanhornia eucnemidarum Crawford, 1909	Animalia	Arthropoda	Insecta	Hymenoptera	Vanhorniidae	Vanhornia	species	Crawford 1909	North America	Canada	CA	Ontario	Anacaster			WGS84	none specified	1995-06/07-26/05	1995	06/07	26/05	Woodpile	SEMC	PreservedSpecimen
Other material	UCFC:Veuc:00000185				adult	Vanhornia eucnemidarum Crawford, 1909	Animalia	Arthropoda	Insecta	Hymenoptera	Vanhorniidae	Vanhornia	species	Crawford 1909	North America	United States	US	Florida	Leon Co.	30.6499	-84.2259	WGS84	none specified	1993-04-05/12	1993	04	05/12		SHSU	PreservedSpecimen
Other material	UCFC:Veuc:00000186		B. E. Cooper	female	adult	Vanhornia eucnemidarum Crawford, 1909	Animalia	Arthropoda	Insecta	Hymenoptera	Vanhorniidae	Vanhornia	species	Crawford 1909	North America	Canada	CA	Ontario	7 mi E Griffith			WGS84	none specified	1991-07-20	1991	07	20		TAMU	PreservedSpecimen
Other material	UCFC:Veuc:00000187			female	adult	Vanhornia eucnemidarum Crawford, 1909	Animalia	Arthropoda	Insecta	Hymenoptera	Vanhorniidae	Vanhornia	species	Crawford 1909	North America	Canada	CA	Ontario	Aylmer, West			WGS84	none specified	1972-07-12	1972	07	12		TAMU	PreservedSpecimen
Other material	UCFC:Veuc:00000188		B. E. Cooper	female	adult	Vanhornia eucnemidarum Crawford, 1909	Animalia	Arthropoda	Insecta	Hymenoptera	Vanhorniidae	Vanhornia	species	Crawford 1909	North America	Canada	CA	Ontario	Griffith			WGS84	none specified	1990-07-19	1990	07	19		TAMU	PreservedSpecimen
Other material	UCFC:Veuc:00000189		R. Wharton	male	adult	Vanhornia eucnemidarum Crawford, 1909	Animalia	Arthropoda	Insecta	Hymenoptera	Vanhorniidae	Vanhornia	species	Crawford 1909	North America	United States	US	Michigan	Ann Arbor Wasahtenaw Co.			WGS84	none specified	1982-07-12/21	1982	07	12/21		TAMU	PreservedSpecimen
Other material	UCFC:Veuc:00000190		R. Wharton	female	adult	Vanhornia eucnemidarum Crawford, 1909	Animalia	Arthropoda	Insecta	Hymenoptera	Vanhorniidae	Vanhornia	species	Crawford 1909	North America	United States	US	Texas	College Station, Lick Creek Park Brazos Co.			WGS84	Malaise Trap	2004-04/05-17/09	2004	04/05	17/09		TAMU	PreservedSpecimen
Other material	UCFC:Veuc:00000191		J. Kloke & D. R. Smith	female	adult	Vanhornia eucnemidarum Crawford, 1909	Animalia	Arthropoda	Insecta	Hymenoptera	Vanhorniidae	Vanhornia	species	Crawford 1909	North America	United States	US	Virginia	4 mi S Cuckoo Louisa Co.			WGS84	Malaise Trap	1988-06-19/29	1988	06	19/29		TAMU	PreservedSpecimen
Other material	UCFC:Veuc:00000192		J. Kloke & D. R. Smith	female	adult	Vanhornia eucnemidarum Crawford, 1909	Animalia	Arthropoda	Insecta	Hymenoptera	Vanhorniidae	Vanhornia	species	Crawford 1909	North America	United States	US	Virginia	4 mi S Cuckoo Louisa Co.			WGS84	Malaise Trap	1988-06-08/18	1988	06	08/18		TAMU	PreservedSpecimen
Other material	UCFC:Veuc:00000193		J. Kloke & D. R. Smith	female	adult	Vanhornia eucnemidarum Crawford, 1909	Animalia	Arthropoda	Insecta	Hymenoptera	Vanhorniidae	Vanhornia	species	Crawford 1909	North America	United States	US	Virginia	4 mi S Cuckoo Louisa Co.			WGS84	Malaise Trap	1988-07-01/12	1988	07	01/12		TAMU	PreservedSpecimen
Other material	UCFC:Veuc:00000194		David R Smith	female	adult	Vanhornia eucnemidarum Crawford, 1909	Animalia	Arthropoda	Insecta	Hymenoptera	Vanhorniidae	Vanhornia	species	Crawford 1909	North America	United States	US	Virginia	Near Annandale Fairfax Co.			WGS84	Malaise Trap	1988-07-02	1988	07	02		TAMU	PreservedSpecimen
Other material	UCFC:Veuc:00000195		David R Smith	female	adult	Vanhornia eucnemidarum Crawford, 1909	Animalia	Arthropoda	Insecta	Hymenoptera	Vanhorniidae	Vanhornia	species	Crawford 1909	North America	United States	US	Virginia	Near Annandale Fairfax Co.			WGS84	Malaise Trap	1988-06-11	1988	06	11		TAMU	PreservedSpecimen
Other material	UCFC:Veuc:00000196	UCFC0528248	Amber Bass	female	adult	Vanhornia eucnemidarum Crawford, 1909	Animalia	Arthropoda	Insecta	Hymenoptera	Vanhorniidae	Vanhornia	species	Crawford 1909	North America	Canada	CA	Manitoba	Howden			WGS84	Malaise Trap	2015-07-14	2015	07	14		UCFC	PreservedSpecimen
Other material	UCFC:Veuc:00000197				adult	Vanhornia eucnemidarum Crawford, 1909	Animalia	Arthropoda	Insecta	Hymenoptera	Vanhorniidae	Vanhornia	species	Crawford 1909	North America	United States	US	Tennessee	Blount	35.5767	-83.8467	WGS84	none specified	2004-06-25	2004	06	25		UCFC	PreservedSpecimen
Other material	UCFC:Veuc:00000198				adult	Vanhornia eucnemidarum Crawford, 1909	Animalia	Arthropoda	Insecta	Hymenoptera	Vanhorniidae	Vanhornia	species	Crawford 1909	North America	United States	US	Tennessee	Blount	35.575	-83.8355	WGS84	none specified	2003-06-25	2003	06	25		UCFC	PreservedSpecimen
Other material	UCFC:Veuc:00000199				adult	Vanhornia eucnemidarum Crawford, 1909	Animalia	Arthropoda	Insecta	Hymenoptera	Vanhorniidae	Vanhornia	species	Crawford 1909	North America	United States	US	Tennessee	Blount	35.5767	-83.8467	WGS84	none specified	2003-06-12	2003	06	12		UCFC	PreservedSpecimen
Other material	UCFC:Veuc:00000200				adult	Vanhornia eucnemidarum Crawford, 1909	Animalia	Arthropoda	Insecta	Hymenoptera	Vanhorniidae	Vanhornia	species	Crawford 1909	North America	United States	US	Tennessee	Blount	35.5767	-83.8467	WGS84	none specified	2004-03-28	2004	03	28		UCFC	PreservedSpecimen
Other material	UCFC:Veuc:00000201				adult	Vanhornia eucnemidarum Crawford, 1909	Animalia	Arthropoda	Insecta	Hymenoptera	Vanhorniidae	Vanhornia	species	Crawford 1909	North America	United States	US	Virginia	1mi Se Dunnsville Essex	37.8667	-76.8	WGS84	none specified	1993-06-09	1993	06	09		UCFC	PreservedSpecimen
Other material	UCFC:Veuc:00000202				adult	Vanhornia eucnemidarum Crawford, 1909	Animalia	Arthropoda	Insecta	Hymenoptera	Vanhorniidae	Vanhornia	species	Crawford 1909	North America	United States	US	West Virginia	Hardy Co.			WGS84	none specified	2004-07-15	2004	07	15		UCRC	PreservedSpecimen
Other material	UCFC:Veuc:00000203		M. & A. O'Brian		adult	Vanhornia eucnemidarum Crawford, 1909	Animalia	Arthropoda	Insecta	Hymenoptera	Vanhorniidae	Vanhornia	species	Crawford 1909	North America	United States	US	Michigan	Sleeping Bear Dunes, Empire Bluffs Area Leelanau Co.			WGS84	none specified	1984-07-14	1984	07	14		UMMZ	PreservedSpecimen
Other material	UCFC:Veuc:00000204		M. & A. O'Brian		adult	Vanhornia eucnemidarum Crawford, 1909	Animalia	Arthropoda	Insecta	Hymenoptera	Vanhorniidae	Vanhornia	species	Crawford 1909	North America	United States	US	Michigan	Sleeping Bear Dunes, Empire Bluffs Area Leelanau Co.			WGS84	none specified	1984-07-14	1984	07	14		UMMZ	PreservedSpecimen
Other material	UCFC:Veuc:00000205		M. & A. O'Brian		adult	Vanhornia eucnemidarum Crawford, 1909	Animalia	Arthropoda	Insecta	Hymenoptera	Vanhorniidae	Vanhornia	species	Crawford 1909	North America	United States	US	Michigan	Sleeping Bear Dunes, Empire Bluffs Area Leelanau Co.			WGS84	none specified	1984-07-14	1984	07	14		UMMZ	PreservedSpecimen
Other material	UCFC:Veuc:00000206		M. & A. O'Brian		adult	Vanhornia eucnemidarum Crawford, 1909	Animalia	Arthropoda	Insecta	Hymenoptera	Vanhorniidae	Vanhornia	species	Crawford 1909	North America	United States	US	Michigan	Sleeping Bear Dunes, Empire Bluffs Area Leelanau Co.			WGS84	none specified	1984-07-14	1984	07	14		UMMZ	PreservedSpecimen
Other material	UCFC:Veuc:00000207		M. & A. O'Brian		adult	Vanhornia eucnemidarum Crawford, 1909	Animalia	Arthropoda	Insecta	Hymenoptera	Vanhorniidae	Vanhornia	species	Crawford 1909	North America	United States	US	Michigan	Sleeping Bear Dunes, Empire Bluffs Area Leelanau Co.			WGS84	none specified	1984-07-14	1984	07	14		UMMZ	PreservedSpecimen
Other material	UCFC:Veuc:00000208		M. & A. O'Brian		adult	Vanhornia eucnemidarum Crawford, 1909	Animalia	Arthropoda	Insecta	Hymenoptera	Vanhorniidae	Vanhornia	species	Crawford 1909	North America	United States	US	Michigan	Sleeping Bear Dunes, Empire Bluffs Area Leelanau Co.			WGS84	none specified	1984-07-14	1984	07	14		UMMZ	PreservedSpecimen
Other material	UCFC:Veuc:00000209		T. H. Hubbell		adult	Vanhornia eucnemidarum Crawford, 1909	Animalia	Arthropoda	Insecta	Hymenoptera	Vanhorniidae	Vanhornia	species	Crawford 1909	North America	United States	US	Michigan	Springvale Charlevoix Co.			WGS84	none specified	1923-07-29	1923	07	29		UMMZ	PreservedSpecimen
Other material	UCFC:Veuc:00000210		Holzenthal		adult	Vanhornia eucnemidarum Crawford, 1909	Animalia	Arthropoda	Insecta	Hymenoptera	Vanhorniidae	Vanhornia	species	Crawford 1909	North America	United States	US	Minnesota	City of Roseville, 3035 Fairview Ave N Ramsey Co.	45.0327	-93.1786	WGS84	none specified	2017-07-01/15	2017	07	01/15		UMSP	PreservedSpecimen
Other material	UCFC:Veuc:00000211		Holzenthal		adult	Vanhornia eucnemidarum Crawford, 1909	Animalia	Arthropoda	Insecta	Hymenoptera	Vanhorniidae	Vanhornia	species	Crawford 1909	North America	United States	US	Minnesota	City of Roseville, 3035 Fairview Ave N Ramsey Co.	45.0327	-93.1786	WGS84	none specified	2017-07-01/15	2017	07	01/15		UMSP	PreservedSpecimen
Other material	UCFC:Veuc:00000212		Holzenthal		adult	Vanhornia eucnemidarum Crawford, 1909	Animalia	Arthropoda	Insecta	Hymenoptera	Vanhorniidae	Vanhornia	species	Crawford 1909	North America	United States	US	Minnesota	City of Roseville, 3035 Fairview Ave N Ramsey Co.	45.0327	-93.1786	WGS84	none specified	2009-06/07-17/31	2009	06/07	17/31		UMSP	PreservedSpecimen
Other material	UCFC:Veuc:00000213		R. Namba		adult	Vanhornia eucnemidarum Crawford, 1909	Animalia	Arthropoda	Insecta	Hymenoptera	Vanhorniidae	Vanhornia	species	Crawford 1909	North America	United States	US	Minnesota	Q-S WRC Sec. 4 Twp. 64N Rge. 10W Basswood Lake Lake Co.			WGS84	none specified	1952-07-15	1952	07	15		UMSP	PreservedSpecimen
Other material	UCFC:Veuc:00000214		C. Mercer		adult	Vanhornia eucnemidarum Crawford, 1909	Animalia	Arthropoda	Insecta	Hymenoptera	Vanhorniidae	Vanhornia	species	Crawford 1909	North America	United States	US	Ohio	Dysart Woods: 5 mi. S. Belmont Co.			WGS84	none specified	1999-06-06/13	1999	06	06/13		UMSP	PreservedSpecimen
Other material	UCFC:Veuc:00000215		DW Barry	female	adult	Vanhornia eucnemidarum Crawford, 1909	Animalia	Arthropoda	Insecta	Hymenoptera	Vanhorniidae	Vanhornia	species	Crawford 1909	North America	United States	US	Maine	West Lebanon York Co.			WGS84	Malaise Trap	1990-08-06	1990	08	06		UNHC	PreservedSpecimen
Other material	UCFC:Veuc:00000216		DW Barry	female	adult	Vanhornia eucnemidarum Crawford, 1909	Animalia	Arthropoda	Insecta	Hymenoptera	Vanhorniidae	Vanhornia	species	Crawford 1909	North America	United States	US	Maine	West Lebanon York Co.			WGS84	Malaise Trap	1991-07-14/30	1991	07	14/30		UNHC	PreservedSpecimen
Other material	UCFC:Veuc:00000217		DW Barry	female	adult	Vanhornia eucnemidarum Crawford, 1909	Animalia	Arthropoda	Insecta	Hymenoptera	Vanhorniidae	Vanhornia	species	Crawford 1909	North America	United States	US	Maine	West Lebanon York Co.			WGS84	Malaise Trap	1991-07-14/30	1991	07	14/30		UNHC	PreservedSpecimen
Other material	UCFC:Veuc:00000218		DW Barry	female	adult	Vanhornia eucnemidarum Crawford, 1909	Animalia	Arthropoda	Insecta	Hymenoptera	Vanhorniidae	Vanhornia	species	Crawford 1909	North America	United States	US	Maine	West Lebanon York Co.			WGS84	Malaise Trap	1991-07-17/23	1991	07	17/23		UNHC	PreservedSpecimen
Other material	UCFC:Veuc:00000219		DW Barry	female	adult	Vanhornia eucnemidarum Crawford, 1909	Animalia	Arthropoda	Insecta	Hymenoptera	Vanhorniidae	Vanhornia	species	Crawford 1909	North America	United States	US	Maine	West Lebanon York Co.			WGS84	Malaise Trap	1991-07-17/23	1991	07	17/23		UNHC	PreservedSpecimen
Other material	UCFC:Veuc:00000220		DW Barry	female	adult	Vanhornia eucnemidarum Crawford, 1909	Animalia	Arthropoda	Insecta	Hymenoptera	Vanhorniidae	Vanhornia	species	Crawford 1909	North America	United States	US	Maine	West Lebanon York Co.			WGS84	Malaise Trap	1991-07-17/23	1991	07	17/23		UNHC	PreservedSpecimen
Other material	UCFC:Veuc:00000221		D. Chandler	female	adult	Vanhornia eucnemidarum Crawford, 1909	Animalia	Arthropoda	Insecta	Hymenoptera	Vanhorniidae	Vanhornia	species	Crawford 1909	North America	United States	US	New Hampshire	1 mi Southwest of Durham Straf Co.			WGS84	Malaise Trap	1987-07-11/18	1987	07	11/18		UNHC	PreservedSpecimen
Other material	UCFC:Veuc:00000222		W.J. Morse	female	adult	Vanhornia eucnemidarum Crawford, 1909	Animalia	Arthropoda	Insecta	Hymenoptera	Vanhorniidae	Vanhornia	species	Crawford 1909	North America	United States	US	New Hampshire	Durham			WGS84	none specified	1977-07-25	1977	07	25	Woodpile	UNHC	PreservedSpecimen
Other material	UCFC:Veuc:00000223		W.J. Morse	female	adult	Vanhornia eucnemidarum Crawford, 1909	Animalia	Arthropoda	Insecta	Hymenoptera	Vanhorniidae	Vanhornia	species	Crawford 1909	North America	United States	US	New Hampshire	Durham			WGS84	none specified	1977-07-25	1977	07	25	Woodpile	UNHC	PreservedSpecimen
Other material	UCFC:Veuc:00000224		W.J. Morse	female	adult	Vanhornia eucnemidarum Crawford, 1909	Animalia	Arthropoda	Insecta	Hymenoptera	Vanhorniidae	Vanhornia	species	Crawford 1909	North America	United States	US	New Hampshire	Durham			WGS84	none specified	1958-08-24	1958	08	24		UNHC	PreservedSpecimen
Other material	UCFC:Veuc:00000225		W.J. Morse	female	adult	Vanhornia eucnemidarum Crawford, 1909	Animalia	Arthropoda	Insecta	Hymenoptera	Vanhorniidae	Vanhornia	species	Crawford 1909	North America	United States	US	New Hampshire	Durham			WGS84	none specified	1958-06-30	1958	06	30	Red Maple	UNHC	PreservedSpecimen
Other material	UCFC:Veuc:00000226		W.J. Morse	female	adult	Vanhornia eucnemidarum Crawford, 1909	Animalia	Arthropoda	Insecta	Hymenoptera	Vanhorniidae	Vanhornia	species	Crawford 1909	North America	United States	US	New Hampshire	Durham			WGS84	none specified	1959-06-24	1959	06	24	Cordwood	UNHC	PreservedSpecimen
Other material	UCFC:Veuc:00000227		W.J. Morse	female	adult	Vanhornia eucnemidarum Crawford, 1909	Animalia	Arthropoda	Insecta	Hymenoptera	Vanhorniidae	Vanhornia	species	Crawford 1909	North America	United States	US	New Hampshire	Durham			WGS84	none specified	1959-06-24	1959	06	24	Cordwood	UNHC	PreservedSpecimen
Other material	UCFC:Veuc:00000228		W.J. Morse	female	adult	Vanhornia eucnemidarum Crawford, 1909	Animalia	Arthropoda	Insecta	Hymenoptera	Vanhorniidae	Vanhornia	species	Crawford 1909	North America	United States	US	New Hampshire	Durham			WGS84	none specified	1959-06-24	1959	06	24	Cordwood	UNHC	PreservedSpecimen
Other material	UCFC:Veuc:00000229		W.J. Morse	female	adult	Vanhornia eucnemidarum Crawford, 1909	Animalia	Arthropoda	Insecta	Hymenoptera	Vanhorniidae	Vanhornia	species	Crawford 1909	North America	United States	US	New Hampshire	Durham			WGS84	none specified	1959-06-24	1959	06	24	Cordwood	UNHC	PreservedSpecimen
Paratype	UCFC:Veuc:00000230		Van Horn	female	adult	Vanhornia eucnemidarum Crawford, 1909	Animalia	Arthropoda	Insecta	Hymenoptera	Vanhorniidae	Vanhornia	species	Crawford 1909	North America	United States	US	Maryland	Plummer’s Island			WGS84	none specified	1908-03-31	1908	03	31		USNM	PreservedSpecimen
Paratype	UCFC:Veuc:00000231		Van Horn	male	adult	Vanhornia eucnemidarum Crawford, 1909	Animalia	Arthropoda	Insecta	Hymenoptera	Vanhorniidae	Vanhornia	species	Crawford 1909	North America	United States	US	Maryland	Silver Springs			WGS84	none specified	1908-03-31	1908	03	31		USNM	PreservedSpecimen
Paratype	UCFC:Veuc:00000232		Van Horn	female	adult	Vanhornia eucnemidarum Crawford, 1909	Animalia	Arthropoda	Insecta	Hymenoptera	Vanhorniidae	Vanhornia	species	Crawford 1909	North America	United States	US	Maryland	Silver Springs			WGS84	none specified	1908-03-31	1908	03	31		USNM	PreservedSpecimen
Holotype	UCFC:Veuc:00000233	USNM 12584	Van Horn	female	adult	Vanhornia eucnemidarum Crawford, 1909	Animalia	Arthropoda	Insecta	Hymenoptera	Vanhorniidae	Vanhornia	species	Crawford 1909	North America	United States	US	Maryland	Silver Springs			WGS84	none specified	1908-03-31	1908	03	31		USNM	PreservedSpecimen
Other material	UCFC:Veuc:00000234			female	adult	Vanhornia eucnemidarum Crawford, 1909	Animalia	Arthropoda	Insecta	Hymenoptera	Vanhorniidae	Vanhornia	species	Crawford 1909	North America	United States	US	Oregon	Klameth Co. Mare's Egg Spring			WGS84	none specified	1976-09-07/09	1976	09	07/09		USNM	PreservedSpecimen
Other material	UCFC:Veuc:00000235			female	adult	Vanhornia eucnemidarum Crawford, 1909	Animalia	Arthropoda	Insecta	Hymenoptera	Vanhorniidae	Vanhornia	species	Crawford 1909	North America	United States	US	Oregon	Klameth Co. Mare's Egg Spring			WGS84	none specified	1976-08-09/11	1976	08	09/11		USNM	PreservedSpecimen
Other material	UCFC:Veuc:00000236	WIRC00060679	Gruber, Jeffrey P.		adult	Vanhornia eucnemidarum Crawford, 1909	Animalia	Arthropoda	Insecta	Hymenoptera	Vanhorniidae	Vanhornia	species	Crawford 1909	North America	United States	US	Wisconsin	Abraham's Woods SNA Green Co.	42.6847	-89.4844	WGS84	flight-intercept trap	2001-06-10/24	2001	06	10/24	Southern Mesic Hardwood Forest	WIRC	PreservedSpecimen
Other material	UCFC:Veuc:00000237	WIRC00060666	Otto, Robert		adult	Vanhornia eucnemidarum Crawford, 1909	Animalia	Arthropoda	Insecta	Hymenoptera	Vanhorniidae	Vanhornia	species	Crawford 1909	North America	United States	US	Wisconsin	Hemlock Draw, 1 mi. N. Leland Sauk Co.	43.3519	-89.9523	WGS84	collected on trunk of maple	1995-06-19	1995	06	19		WIRC	PreservedSpecimen	collected on trunk of maple
Other material	UCFC:Veuc:00000238	WIRC00060686	Young, Daniel K.		adult	Vanhornia eucnemidarum Crawford, 1909	Animalia	Arthropoda	Insecta	Hymenoptera	Vanhorniidae	Vanhornia	species	Crawford 1909	North America	United States	US	Wisconsin	Leland; Hemlock Draw Sauk Co.	43.3519	-89.9523	WGS84	none specified	1995-06-22	1995	06	22		WIRC	PreservedSpecimen
Other material	UCFC:Veuc:00000239	WIRC00062365	Otto, Robert		adult	Vanhornia eucnemidarum Crawford, 1909	Animalia	Arthropoda	Insecta	Hymenoptera	Vanhorniidae	Vanhornia	species	Crawford 1909	North America	United States	US	Wisconsin	Madison, Picnic Point Dane Co.	43.0894	-89.4162	WGS84	none specified	1995-06-21	1995	06	21	Maple	WIRC	PreservedSpecimen	collected on trunk of maple
Other material	UCFC:Veuc:00000240	WIRC00060661	Otto, Robert		adult	Vanhornia eucnemidarum Crawford, 1909	Animalia	Arthropoda	Insecta	Hymenoptera	Vanhorniidae	Vanhornia	species	Crawford 1909	North America	United States	US	Wisconsin	Madison, Picnic Point Dane Co.	43.0894	-89.4162	WGS84	none specified	1995-06-21	1995	06	21	Maple	WIRC	PreservedSpecimen	collected on trunk of maple
Other material	UCFC:Veuc:00000241	WIRC00060662	Otto, Robert		adult	Vanhornia eucnemidarum Crawford, 1909	Animalia	Arthropoda	Insecta	Hymenoptera	Vanhorniidae	Vanhornia	species	Crawford 1909	North America	United States	US	Wisconsin	Madison, Picnic Point Dane Co.	43.0894	-89.4162	WGS84	none specified	1995-06-21	1995	06	21	Maple	WIRC	PreservedSpecimen	collected on trunk of maple
Other material	UCFC:Veuc:00000242	WIRC00060663	Otto, Robert		adult	Vanhornia eucnemidarum Crawford, 1909	Animalia	Arthropoda	Insecta	Hymenoptera	Vanhorniidae	Vanhornia	species	Crawford 1909	North America	United States	US	Wisconsin	Madison, Picnic Point Dane Co.	43.0894	-89.4162	WGS84	none specified	1995-06-21	1995	06	21	Maple	WIRC	PreservedSpecimen	collected on trunk of maple
Other material	UCFC:Veuc:00000243	WIRC00060664	Otto, Robert		adult	Vanhornia eucnemidarum Crawford, 1909	Animalia	Arthropoda	Insecta	Hymenoptera	Vanhorniidae	Vanhornia	species	Crawford 1909	North America	United States	US	Wisconsin	Madison, Picnic Point Dane Co.	43.0894	-89.4162	WGS84	none specified	1995-06-19	1995	06	19	Maple	WIRC	PreservedSpecimen	collected on trunk of maple
Other material	UCFC:Veuc:00000244	WIRC00060665	Otto, Robert		adult	Vanhornia eucnemidarum Crawford, 1909	Animalia	Arthropoda	Insecta	Hymenoptera	Vanhorniidae	Vanhornia	species	Crawford 1909	North America	United States	US	Wisconsin	Madison, Picnic Point Dane Co.	43.0894	-89.4162	WGS84	none specified	1995-06-21	1995	06	21	Maple	WIRC	PreservedSpecimen	collected on trunk of maple
Other material	UCFC:Veuc:00000245	WIRC00060667	Otto, Robert		adult	Vanhornia eucnemidarum Crawford, 1909	Animalia	Arthropoda	Insecta	Hymenoptera	Vanhorniidae	Vanhornia	species	Crawford 1909	North America	United States	US	Wisconsin	Madison, Picnic Point Dane Co.	43.0894	-89.4162	WGS84	none specified	1995-06-21	1995	06	21	Maple	WIRC	PreservedSpecimen	collected on trunk of maple
Other material	UCFC:Veuc:00000246	WIRC00060668	Otto, Robert		adult	Vanhornia eucnemidarum Crawford, 1909	Animalia	Arthropoda	Insecta	Hymenoptera	Vanhorniidae	Vanhornia	species	Crawford 1909	North America	United States	US	Wisconsin	Madison, Picnic Point Dane Co.	43.0894	-89.4162	WGS84	none specified	1995-06-25	1995	06	25	Maple	WIRC	PreservedSpecimen	collected on trunk of maple
Other material	UCFC:Veuc:00000247	WIRC00060669	Otto, Robert		adult	Vanhornia eucnemidarum Crawford, 1909	Animalia	Arthropoda	Insecta	Hymenoptera	Vanhorniidae	Vanhornia	species	Crawford 1909	North America	United States	US	Wisconsin	Madison, Picnic Point Dane Co.	43.0894	-89.4162	WGS84	none specified	1995-06-25	1995	06	25	Maple	WIRC	PreservedSpecimen	collected on trunk of maple
Other material	UCFC:Veuc:00000248	WIRC00060670	Otto, Robert		adult	Vanhornia eucnemidarum Crawford, 1909	Animalia	Arthropoda	Insecta	Hymenoptera	Vanhorniidae	Vanhornia	species	Crawford 1909	North America	United States	US	Wisconsin	Madison, Picnic Point Dane Co.	43.0894	-89.4162	WGS84	none specified	1995-06-25	1995	06	25	Maple	WIRC	PreservedSpecimen	collected on trunk of maple
Other material	UCFC:Veuc:00000249	WIRC00060671	Otto, Robert		adult	Vanhornia eucnemidarum Crawford, 1909	Animalia	Arthropoda	Insecta	Hymenoptera	Vanhorniidae	Vanhornia	species	Crawford 1909	North America	United States	US	Wisconsin	Madison, Picnic Point Dane Co.	43.0894	-89.4162	WGS84	none specified	1995-06-25	1995	06	25	Maple	WIRC	PreservedSpecimen	collected on trunk of maple
Other material	UCFC:Veuc:00000250	WIRC00060672	Otto, Robert		adult	Vanhornia eucnemidarum Crawford, 1909	Animalia	Arthropoda	Insecta	Hymenoptera	Vanhorniidae	Vanhornia	species	Crawford 1909	North America	United States	US	Wisconsin	Madison, Picnic Point Dane Co.	43.0894	-89.4162	WGS84	none specified	1995-06-23	1995	06	23	Maple	WIRC	PreservedSpecimen	collected on trunk of maple
Other material	UCFC:Veuc:00000251	WIRC00060673	Otto, Robert		adult	Vanhornia eucnemidarum Crawford, 1909	Animalia	Arthropoda	Insecta	Hymenoptera	Vanhorniidae	Vanhornia	species	Crawford 1909	North America	United States	US	Wisconsin	Madison, Picnic Point Dane Co.	43.0894	-89.4162	WGS84	none specified	1995-06-23	1995	06	23	Maple	WIRC	PreservedSpecimen	collected on trunk of maple
Other material	UCFC:Veuc:00000252	WIRC00060674	Otto, Robert		adult	Vanhornia eucnemidarum Crawford, 1909	Animalia	Arthropoda	Insecta	Hymenoptera	Vanhorniidae	Vanhornia	species	Crawford 1909	North America	United States	US	Wisconsin	Madison, Picnic Point Dane Co.	43.0894	-89.4162	WGS84	none specified	1995-06-23	1995	06	23	Maple	WIRC	PreservedSpecimen	collected on trunk of maple
Other material	UCFC:Veuc:00000253	WIRC00060675	Otto, Robert		adult	Vanhornia eucnemidarum Crawford, 1909	Animalia	Arthropoda	Insecta	Hymenoptera	Vanhorniidae	Vanhornia	species	Crawford 1909	North America	United States	US	Wisconsin	Madison, Picnic Point Dane Co.	43.0894	-89.4162	WGS84	none specified	1995-06-23	1995	06	23	Maple	WIRC	PreservedSpecimen	collected on trunk of maple
Other material	UCFC:Veuc:00000254	WIRC00060676	Otto, Robert		adult	Vanhornia eucnemidarum Crawford, 1909	Animalia	Arthropoda	Insecta	Hymenoptera	Vanhorniidae	Vanhornia	species	Crawford 1909	North America	United States	US	Wisconsin	Madison, Picnic Point Dane Co.	43.0894	-89.4162	WGS84	none specified	1995-06-23	1995	06	23	Maple	WIRC	PreservedSpecimen	collected on trunk of maple
Other material	UCFC:Veuc:00000255	WIRC00060677	Otto, Robert		adult	Vanhornia eucnemidarum Crawford, 1909	Animalia	Arthropoda	Insecta	Hymenoptera	Vanhorniidae	Vanhornia	species	Crawford 1909	North America	United States	US	Wisconsin	Madison, Picnic Point Dane Co.	43.0894	-89.4162	WGS84	none specified	1995-06-23	1995	06	23	Maple	WIRC	PreservedSpecimen	collected on trunk of maple
Other material	UCFC:Veuc:00000256	WIRC00060678	Otto, Robert		adult	Vanhornia eucnemidarum Crawford, 1909	Animalia	Arthropoda	Insecta	Hymenoptera	Vanhorniidae	Vanhornia	species	Crawford 1909	North America	United States	US	Wisconsin	Madison, Picnic Point Dane Co.	43.0894	-89.4162	WGS84	none specified	1995-06-23	1995	06	23	Maple	WIRC	PreservedSpecimen	collected on trunk of maple
Other material	UCFC:Veuc:00000257	WIRC00062364	Otto, Robert		adult	Vanhornia eucnemidarum Crawford, 1909	Animalia	Arthropoda	Insecta	Hymenoptera	Vanhorniidae	Vanhornia	species	Crawford 1909	North America	United States	US	Wisconsin	Madison, UW Campus Dane Co.	43.0747	-89.4153	WGS84	found foraging on maple trunk with Isorhipis obliqua	1995-06-17	1995	06	17	Maple	WIRC	PreservedSpecimen	found foraging on maple trunk with Isorhipis obliqua
Other material	UCFC:Veuc:00000258	WIRC00060687	Young, Daniel K.		adult	Vanhornia eucnemidarum Crawford, 1909	Animalia	Arthropoda	Insecta	Hymenoptera	Vanhorniidae	Vanhornia	species	Crawford 1909	North America	United States	US	Wisconsin	Quincy Bluff TNC Adams Co.	43.8675	-89.8854	WGS84	Malaise trap	2009-06-15/23	2009	06	15/23	Oak/Pine Barrens	WIRC	PreservedSpecimen
Other material	UCFC:Veuc:00000259	WIRC00060680	Gruber, Jeffrey P.		adult	Vanhornia eucnemidarum Crawford, 1909	Animalia	Arthropoda	Insecta	Hymenoptera	Vanhorniidae	Vanhornia	species	Crawford 1909	North America	United States	US	Wisconsin	Renak - Polak Woods SNA Racine Co.	42.8092	-87.8608	WGS84	Flight-Intercept Trap	2000-06-08/23	2000	06	08/23	Southern Mesic Hardwood Forest	WIRC	PreservedSpecimen
Other material	UCFC:Veuc:00000260	WIRC00060681	Gruber, Jeffrey P.		adult	Vanhornia eucnemidarum Crawford, 1909	Animalia	Arthropoda	Insecta	Hymenoptera	Vanhorniidae	Vanhornia	species	Crawford 1909	North America	United States	US	Wisconsin	Renak - Polak Woods SNA Racine Co.	42.8092	-87.8608	WGS84	Flight-Intercept Trap	2000-06/07-23/09	2000	06/07	23/09	Southern Mesic Hardwood Forest	WIRC	PreservedSpecimen
Other material	UCFC:Veuc:00000261	WIRC00060682	Gruber, Jeffrey P.		adult	Vanhornia eucnemidarum Crawford, 1909	Animalia	Arthropoda	Insecta	Hymenoptera	Vanhorniidae	Vanhornia	species	Crawford 1909	North America	United States	US	Wisconsin	Renak - Polak Woods SNA Racine Co.	42.8092	-87.8608	WGS84	Flight-Intercept Trap	2000-06-08/23	2000	06	08/23	Southern Mesic Hardwood Forest	WIRC	PreservedSpecimen
Other material	UCFC:Veuc:00000262	WIRC00060683	Gruber, Jeffrey P.		adult	Vanhornia eucnemidarum Crawford, 1909	Animalia	Arthropoda	Insecta	Hymenoptera	Vanhorniidae	Vanhornia	species	Crawford 1909	North America	United States	US	Wisconsin	Renak - Polak Woods SNA Racine Co.	42.8092	-87.8608	WGS84	Flight-Intercept Trap	2000-06-08/23	2000	06	08/23	Southern Mesic Hardwood Forest	WIRC	PreservedSpecimen
Other material	UCFC:Veuc:00000263	WIRC00060684	Gruber, Jeffrey P.		adult	Vanhornia eucnemidarum Crawford, 1909	Animalia	Arthropoda	Insecta	Hymenoptera	Vanhorniidae	Vanhornia	species	Crawford 1909	North America	United States	US	Wisconsin	Renak - Polak Woods SNA Racine Co.	42.8092	-87.8608	WGS84	Flight-Intercept Trap	2000-06-08/23	2000	06	08/23	Southern Mesic Hardwood Forest	WIRC	PreservedSpecimen
Other material	UCFC:Veuc:00000264	WIRC00060685	Otto, Robert		adult	Vanhornia eucnemidarum Crawford, 1909	Animalia	Arthropoda	Insecta	Hymenoptera	Vanhorniidae	Vanhornia	species	Crawford 1909	North America	United States	US	Wisconsin	Roeckcert's land ~3 mi. N. Suring Oconto Co.	44.9931	-88.4378	WGS84	none specified	1996-07-21	1996	07	21	Beech	WIRC	PreservedSpecimen	coll. on beech log
Other material	UCFC:Veuc:00000266	JBWM0378038	Amber Bass	female	adult	Vanhornia eucnemidarum Crawford, 1909	Animalia	Arthropoda	Insecta	Hymenoptera	Vanhorniidae	Vanhornia	species	Crawford 1909	North America	Canada	CA	Manitoba	Howden			WGS84	Malaise Trap	2015-07-14	2015	07	14		WRME	PreservedSpecimen
Other material	UCFC:Veuc:00000267				adult	Vanhornia eucnemidarum Crawford, 1909	Animalia	Arthropoda	Insecta	Hymenoptera	Vanhorniidae	Vanhornia	species	Crawford 1909	North America	Canada	CA	Ontario	Alymer West			WGS84	none specified	1981-06/07-21/31	1981	06/07	21/31			PreservedSpecimen	From Townes and Townes (1981)
Other material	UCFC:Veuc:00000268				adult	Vanhornia eucnemidarum Crawford, 1909	Animalia	Arthropoda	Insecta	Hymenoptera	Vanhorniidae	Vanhornia	species	Crawford 1909	North America	Canada	CA	Ontario	Cumberland			WGS84	none specified	1981-06/07-21/31	1981	06/07	21/31			PreservedSpecimen	From Townes and Townes (1981)
Other material	UCFC:Veuc:00000269				adult	Vanhornia eucnemidarum Crawford, 1909	Animalia	Arthropoda	Insecta	Hymenoptera	Vanhorniidae	Vanhornia	species	Crawford 1909	North America	Canada	CA	Ontario	Rondeau Provincial Park			WGS84	none specified	1981-06/07-21/31	1981	06/07	21/31			PreservedSpecimen	From Townes and Townes (1981)
Other material	UCFC:Veuc:00000270				adult	Vanhornia eucnemidarum Crawford, 1909	Animalia	Arthropoda	Insecta	Hymenoptera	Vanhorniidae	Vanhornia	species	Crawford 1909	North America	United States	US	Georgia	Forsyth			WGS84	none specified	1981-05-18/30	1981	05	18/30			PreservedSpecimen	From Townes and Townes (1981)
Other material	UCFC:Veuc:00000271		Dennis Haines		adult	Vanhornia eucnemidarum Crawford, 1909	Animalia	Arthropoda	Insecta	Hymenoptera	Vanhorniidae	Vanhornia	species	Crawford 1909	North America	United States	US	Indiana	Tippecanoe County			WGS84	none specified	1977-06-15	1977	06	15			PreservedSpecimen	From Bug Guide
Other material	UCFC:Veuc:00000272		Ron Johnson		adult	Vanhornia eucnemidarum Crawford, 1909	Animalia	Arthropoda	Insecta	Hymenoptera	Vanhorniidae	Vanhornia	species	Crawford 1909	North America	United States	US	Kansas	7.5mi N of El Dorado			WGS84	none specified	2017-07-15	2017	07	15			PreservedSpecimen	From Bug Guide
Other material	UCFC:Veuc:00000273				adult	Vanhornia eucnemidarum Crawford, 1909	Animalia	Arthropoda	Insecta	Hymenoptera	Vanhorniidae	Vanhornia	species	Crawford 1909	North America	United States	US	Kentucky	Golden Pond			WGS84	none specified	1981-06/07-21/31	1981	06/07	21/31			PreservedSpecimen	From Townes and Townes (1981)
Other material	UCFC:Veuc:00000274				adult	Vanhornia eucnemidarum Crawford, 1909	Animalia	Arthropoda	Insecta	Hymenoptera	Vanhorniidae	Vanhornia	species	Crawford 1909	North America	United States	US	Michigan	Ann Arbor			WGS84	none specified	1981-06/07-21/31	1981	06/07	21/31			PreservedSpecimen	From Townes and Townes (1981)
Other material	UCFC:Veuc:00000275		James G. Truchan		adult	Vanhornia eucnemidarum Crawford, 1909	Animalia	Arthropoda	Insecta	Hymenoptera	Vanhorniidae	Vanhornia	species	Crawford 1909	North America	United States	US	Michigan	St. Charles			WGS84	Rotary Trap	1968-06-19	1968	06	19			PreservedSpecimen	From Personal Collection Of Ding Johnson
Other material	UCFC:Veuc:00000276		D. P. Cowan		adult	Vanhornia eucnemidarum Crawford, 1909	Animalia	Arthropoda	Insecta	Hymenoptera	Vanhorniidae	Vanhornia	species	Crawford 1909	North America	United States	US	Michigan	T2S-R12W Kalamazoo Co.			WGS84	none specified	1980-07-08	1980	07	08			PreservedSpecimen	From Personal Collection Of Ding Johnson
Other material	UCFC:Veuc:00000277				adult	Vanhornia eucnemidarum Crawford, 1909	Animalia	Arthropoda	Insecta	Hymenoptera	Vanhorniidae	Vanhornia	species	Crawford 1909	North America	United States	US	New York	Ithaca			WGS84	none specified	1981-06/07-21/31	1981	06/07	21/31			PreservedSpecimen	From Townes and Townes (1981)
Other material	UCFC:Veuc:00000278				adult	Vanhornia eucnemidarum Crawford, 1909	Animalia	Arthropoda	Insecta	Hymenoptera	Vanhorniidae	Vanhornia	species	Crawford 1909	North America	United States	US	North Carolina	Highlands			WGS84	none specified	1981-06/07-21/31	1981	06/07	21/31			PreservedSpecimen	From Townes and Townes (1981)
Other material	UCFC:Veuc:00000279		Bill Keim		adult	Vanhornia eucnemidarum Crawford, 1909	Animalia	Arthropoda	Insecta	Hymenoptera	Vanhorniidae	Vanhornia	species	Crawford 1909	North America	United States	US	Pennsylvania	Buckingham, Bucks County			WGS84	none specified	2016-06-11	2016	06	11			PreservedSpecimen	From Bug Guide
Other material	UCFC:Veuc:00000280		Champlain		adult	Vanhornia eucnemidarum Crawford, 1909	Animalia	Arthropoda	Insecta	Hymenoptera	Vanhorniidae	Vanhornia	species	Crawford 1909	North America	United States	US	Pennsylvania	Hummelstown			WGS84	none specified	1921	1921					PreservedSpecimen	From Bureau of Plant Industry
Other material	UCFC:Veuc:00000281				adult	Vanhornia eucnemidarum Crawford, 1909	Animalia	Arthropoda	Insecta	Hymenoptera	Vanhorniidae	Vanhornia	species	Crawford 1909	North America	United States	US	Pennsylvania	Hummelstown			WGS84	none specified	1917-06-11	1917	06	11			PreservedSpecimen	From Bureau of Plant Industry
Other material	UCFC:Veuc:00000282		M. Skvarla		adult	Vanhornia eucnemidarum Crawford, 1909	Animalia	Arthropoda	Insecta	Hymenoptera	Vanhorniidae	Vanhornia	species	Crawford 1909	North America	United States	US	Pennsylvania	Irwin Westmoreland Co.			WGS84	EAB-style Purple Panel Trap	2006-07-15	2006	07	15			PreservedSpecimen	From Personal Collection of Michael Skvarla
Other material	UCFC:Veuc:00000283				adult	Vanhornia eucnemidarum Crawford, 1909	Animalia	Arthropoda	Insecta	Hymenoptera	Vanhorniidae	Vanhornia	species	Crawford 1909	North America	United States	US	South Carolina	Cleveland			WGS84	none specified	1981-6/7-21/31	1981	6/7	21/31			PreservedSpecimen	From Townes and Townes (1981)
Other material	UCFC:Veuc:00000284				adult	Vanhornia eucnemidarum Crawford, 1909	Animalia	Arthropoda	Insecta	Hymenoptera	Vanhorniidae	Vanhornia	species	Crawford 1909	North America	United States	US	Tennessee	Natchez Trace State Park at Lexington			WGS84	none specified	1981-06-01/15	1981	06	01/15			PreservedSpecimen	From Townes and Townes (1981)
Other material	UCFC:Veuc:00000285		Robert Otto		adult	Vanhornia eucnemidarum Crawford, 1909	Animalia	Arthropoda	Insecta	Hymenoptera	Vanhorniidae	Vanhornia	species	Crawford 1909	North America	United States	US	Wisconsin	Madison, Picnic Point Dane Co.			WGS84	none specified	1995-07-23	1995	07	23			PreservedSpecimen	From Personal Collection Of Ding Johnson

## Sheet: Vocabularies
ISO 693-2	Language	CountryID	Country	Roles	YesNo	CC	Code	ThreatStatus	NativeStatus
abk	Abkhazian	AF	AFGHANISTAN	Originator	Yes	cc0	ICBN	Least Concern	Native
ace	Achinese	AX	ALAND ISLANDS	Content Provider	No	publicdomain	ICZN	Near Threatened	Introduced
ach	Acoli	AL	ALBANIA	Principal Investigator		by	ICNB	Vulnerable	Naturalised
ada	Adangme	DZ	ALGERIA	Editor		by-nc-sa	ICTV	Endangered	Invasive
ady	Adyghe	AS	AMERICAN SAMOA	Publisher		by-sa	BC	Critically Endangered	Managed
aar	Afar	AD	ANDORRA	Processor			ICNPC	Extinct in the Wild	Uncertain
afh	Afrihili	AO	ANGOLA	Custodian/Steward			BioCode	Extinct
afr	Afrikaans	AI	ANGUILLA	Author				Data Deficient
afa	Afro-Asiatic languages	AQ	ANTARCTICA	Metadata Provider				Not Evaluated
ain	Ainu	AG	ANTIGUA AND BARBUDA	Distributor
aka	Akan	AR	ARGENTINA	User
akk	Akkadian	AM	ARMENIA
alb	Albanian	AW	ARUBA
ale	Aleut	AU	AUSTRALIA
alg	Algonquian languages	AT	AUSTRIA
tut	Altaic languages	AZ	AZERBAIJAN
amh	Amharic	BS	BAHAMAS
anp	Angika	BH	BAHRAIN
apa	Apache languages	BD	BANGLADESH
ara	Arabic	BB	BARBADOS
arg	Aragonese	BY	BELARUS
arp	Arapaho	BE	BELGIUM
arw	Arawak	BZ	BELIZE
arm	Armenian	BJ	BENIN
rup	Aromanian	BM	BERMUDA
art	Artificial languages	BT	BHUTAN
asm	Assamese	BO	BOLIVIA
ast	Asturian	BA	BOSNIA AND HERZEGOVINA
ath	Athapascan languages	BW	BOTSWANA
aus	Australian languages	BV	BOUVET ISLAND
map	Austronesian languages	BR	BRAZIL
ava	Avaric	IO	BRITISH INDIAN OCEAN TERRITORY
ave	Avestan	BN	BRUNEI DARUSSALAM
awa	Awadhi	BG	BULGARIA
aym	Aymara	BF	BURKINA FASO
aze	Azerbaijani	BI	BURUNDI
ban	Balinese	KH	CAMBODIA
bat	Baltic languages	CM	CAMEROON
bal	Baluchi	CA	CANADA
bam	Bambara	CV	CAPE VERDE
bai	Bamileke languages	KY	CAYMAN ISLANDS
bad	Banda languages	CF	CENTRAL AFRICAN REPUBLIC
bnt	Bantu (Other)	TD	CHAD
bas	Basa	CL	CHILE
bak	Bashkir	CN	CHINA
baq	Basque	TW	CHINESE TAIPEI
btk	Batak languages	CX	CHRISTMAS ISLAND
bej	Beja	CC	COCOS (KEELING) ISLANDS
bel	Belarusian	CO	COLOMBIA
bem	Bemba	KM	COMOROS
ben	Bengali	CG	CONGO
ber	Berber languages	CD	CONGO, THE DEMOCRATIC REPUBLIC OF THE
bho	Bhojpuri	CK	COOK ISLANDS
bih	Bihari languages	CR	COSTA RICA
bik	Bikol	CI	COTE D'IVOIRE
bin	Bini	HR	CROATIA
bis	Bislama	CU	CUBA
byn	Blin	CY	CYPRUS
zbl	Blissymbols	CZ	CZECH REPUBLIC
nob	Bokmål, Norwegian	DK	DENMARK
bos	Bosnian	DJ	DJIBOUTI
bra	Braj	DM	DOMINICA
bre	Breton	DO	DOMINICAN REPUBLIC
bug	Buginese	EC	ECUADOR
bul	Bulgarian	EG	EGYPT
bua	Buriat	SV	EL SALVADOR
bur	Burmese	GQ	EQUATORIAL GUINEA
cad	Caddo	ER	ERITREA
cat	Catalan	EE	ESTONIA
cau	Caucasian languages	ET	ETHIOPIA
ceb	Cebuano	FK	FALKLAND ISLANDS (MALVINAS)
cel	Celtic languages	FO	FAROE ISLANDS
cai	Central American Indian languages	FJ	FIJI
khm	Central Khmer	FI	FINLAND
chg	Chagatai	FR	FRANCE
cmc	Chamic languages	GF	FRENCH GUIANA
cha	Chamorro	PF	FRENCH POLYNESIA
che	Chechen	TF	FRENCH SOUTHERN TERRITORIES
chr	Cherokee	GA	GABON
chy	Cheyenne	GM	GAMBIA
chb	Chibcha	GE	GEORGIA
nya	Chichewa	DE	GERMANY
chi	Chinese	GH	GHANA
chn	Chinook jargon	GI	GIBRALTAR
chp	Chipewyan	GR	GREECE
cho	Choctaw	GL	GREENLAND
chu	Church Slavic	GD	GRENADA
chk	Chuukese	GP	GUADELOUPE
chv	Chuvash	GU	GUAM
nwc	Classical Newari	GT	GUATEMALA
syc	Classical Syriac	GG	GUERNSEY
cop	Coptic	GN	GUINEA
cor	Cornish	GW	GUINEA-BISSAU
cos	Corsican	GY	GUYANA
cre	Cree	HT	HAITI
mus	Creek	HM	HEARD ISLAND AND MCDONALD ISLANDS
crp	Creoles and pidgins	HN	HONDURAS
cpe	Creoles and pidgins, English based	HK	HONG KONG
cpf	Creoles and pidgins, French-based	HU	HUNGARY
cpp	Creoles and pidgins, Portuguese-based	IS	ICELAND
crh	Crimean Tatar	IN	INDIA
hrv	Croatian	ID	INDONESIA
cus	Cushitic languages	IR	IRAN (ISLAMIC REPUBLIC OF)
cze	Czech	IQ	IRAQ
dak	Dakota	IE	IRELAND
dan	Danish	IM	ISLE OF MAN
dar	Dargwa	IL	ISRAEL
del	Delaware	IT	ITALY
din	Dinka	JM	JAMAICA
div	Divehi	JP	JAPAN
doi	Dogri	JE	JERSEY
dgr	Dogrib	JO	JORDAN
dra	Dravidian languages	KZ	KAZAKHSTAN
dua	Duala	KE	KENYA
dut	Dutch	KI	KIRIBATI
dum	Dutch, Middle (ca.1050-1350)	KP	KOREA, DEMOCRATIC PEOPLE'S REPUBLIC OF
dyu	Dyula	KR	KOREA, REPUBLIC OF
dzo	Dzongkha	KW	KUWAIT
frs	Eastern Frisian	KG	KYRGYZSTAN
efi	Efik	LA	LAO PEOPLE'S DEMOCRATIC REPUBLIC
egy	Egyptian (Ancient)	LV	LATVIA
eka	Ekajuk	LB	LEBANON
elx	Elamite	LS	LESOTHO
eng	English	LR	LIBERIA
enm	English, Middle (1100-1500)	LY	LIBYAN ARAB JAMAHIRIYA
ang	English, Old (ca.450-1100)	LI	LIECHTENSTEIN
myv	Erzya	LT	LITHUANIA
epo	Esperanto	LU	LUXEMBOURG
est	Estonian	MO	MACAO
ewe	Ewe	MK	MACEDONIA, THE FORMER YUGOSLAV REPUBLIC OF
ewo	Ewondo	MG	MADAGASCAR
fan	Fang	MW	MALAWI
fat	Fanti	MY	MALAYSIA
fao	Faroese	MV	MALDIVES
fij	Fijian	ML	MALI
fil	Filipino	MT	MALTA
fin	Finnish	MH	MARSHALL ISLANDS
fiu	Finno-Ugrian languages	MQ	MARTINIQUE
fon	Fon	MR	MAURITANIA
fre	French	MU	MAURITIUS
frm	French, Middle (ca.1400-1600)	YT	MAYOTTE
fro	French, Old (842-ca.1400)	MX	MEXICO
fur	Friulian	FM	MICRONESIA, FEDERATED STATES OF
ful	Fulah	MD	MOLDOVA, REPUBLIC OF
gaa	Ga	MC	MONACO
gla	Gaelic	MN	MONGOLIA
car	Galibi Carib	ME	MONTENEGRO
glg	Galician	MS	MONTSERRAT
lug	Ganda	MA	MOROCCO
gay	Gayo	MZ	MOZAMBIQUE
gba	Gbaya	MM	MYANMAR
gez	Geez	NA	NAMIBIA
geo	Georgian	NR	NAURU
ger	German	NP	NEPAL
gmh	German, Middle High (ca.1050-1500)	NL	NETHERLANDS
goh	German, Old High (ca.750-1050)	AN	NETHERLANDS ANTILLES
gem	Germanic languages	NC	NEW CALEDONIA
gil	Gilbertese	NZ	NEW ZEALAND
gon	Gondi	NI	NICARAGUA
gor	Gorontalo	NE	NIGER
got	Gothic	NG	NIGERIA
grb	Grebo	NU	NIUE
grc	Greek, Ancient (to 1453)	NF	NORFOLK ISLAND
gre	Greek, Modern (1453-)	MP	NORTHERN MARIANA ISLANDS
grn	Guarani	NO	NORWAY
guj	Gujarati	OM	OMAN
gwi	Gwich'in	PK	PAKISTAN
hai	Haida	PW	PALAU
hat	Haitian	PS	PALESTINIAN TERRITORY, OCCUPIED
hau	Hausa	PA	PANAMA
haw	Hawaiian	PG	PAPUA NEW GUINEA
heb	Hebrew	PY	PARAGUAY
her	Herero	PE	PERU
hil	Hiligaynon	PH	PHILIPPINES
him	Himachali languages	PN	PITCAIRN
hin	Hindi	PL	POLAND
hmo	Hiri Motu	PT	PORTUGAL
hit	Hittite	PR	PUERTO RICO
hmn	Hmong	QA	QATAR
hun	Hungarian	RE	REUNION
hup	Hupa	RO	ROMANIA
iba	Iban	RU	RUSSIAN FEDERATION
ice	Icelandic	RW	RWANDA
ido	Ido	BL	SAINT BARTHELEMY
ibo	Igbo	SH	SAINT HELENA
ijo	Ijo languages	KN	SAINT KITTS AND NEVIS
ilo	Iloko	LC	SAINT LUCIA
smn	Inari Sami	PM	SAINT PIERRE AND MIQUELON
inc	Indic languages	VC	SAINT VINCENT AND THE GRENADINES
ine	Indo-European languages	WS	SAMOA
ind	Indonesian	SM	SAN MARINO
inh	Ingush	ST	SAO TOME AND PRINCIPE
ina	Interlingua (International Auxiliary Language Association)	SA	SAUDI ARABIA
ile	Interlingue	SN	SENEGAL
iku	Inuktitut	RS	SERBIA
ipk	Inupiaq	SC	SEYCHELLES
ira	Iranian languages	SL	SIERRA LEONE
gle	Irish	SG	SINGAPORE
mga	Irish, Middle (900-1200)	SK	SLOVAKIA
sga	Irish, Old (to 900)	SI	SLOVENIA
iro	Iroquoian languages	SB	SOLOMON ISLANDS
ita	Italian	SO	SOMALIA
jpn	Japanese	ZA	SOUTH AFRICA
jav	Javanese	GS	SOUTH GEORGIA AND THE SOUTH SANDWICH ISLANDS
jrb	Judeo-Arabic	ES	SPAIN
jpr	Judeo-Persian	LK	SRI LANKA
kbd	Kabardian	SD	SUDAN
kab	Kabyle	SR	SURINAME
kac	Kachin	SJ	SVALBARD AND JAN MAYEN
kal	Kalaallisut	SZ	SWAZILAND
xal	Kalmyk	SE	SWEDEN
kam	Kamba	CH	SWITZERLAND
kan	Kannada	SY	SYRIAN ARAB REPUBLIC
kau	Kanuri	TJ	TAJIKISTAN
kaa	Kara-Kalpak	TZ	TANZANIA, UNITED REPUBLIC OF
krc	Karachay-Balkar	TH	THAILAND
krl	Karelian	TL	TIMOR-LESTE
kar	Karen languages	TG	TOGO
kas	Kashmiri	TK	TOKELAU
csb	Kashubian	TO	TONGA
kaw	Kawi	TT	TRINIDAD AND TOBAGO
kaz	Kazakh	TN	TUNISIA
kha	Khasi	TR	TURKEY
khi	Khoisan languages	TM	TURKMENISTAN
kho	Khotanese	TC	TURKS AND CAICOS ISLANDS
kik	Kikuyu	TV	TUVALU
kmb	Kimbundu	UG	UGANDA
kin	Kinyarwanda	UA	UKRAINE
kir	Kirghiz	AE	UNITED ARAB EMIRATES
tlh	Klingon	GB	UNITED KINGDOM
kom	Komi	US	UNITED STATES
kon	Kongo	UM	UNITED STATES MINOR OUTLYING ISLANDS
kok	Konkani	UY	URUGUAY
kor	Korean	UZ	UZBEKISTAN
kos	Kosraean	VU	VANUATU
kpe	Kpelle	VA	VATICAN CITY STATE (HOLY SEE)
kro	Kru languages	VE	VENEZUELA
kua	Kuanyama	VN	VIET NAM
kum	Kumyk	VG	VIRGIN ISLANDS (BRITISH)
kur	Kurdish	VI	VIRGIN ISLANDS (U.S.)
kru	Kurukh	WF	WALLIS AND FUTUNA
kut	Kutenai	EH	WESTERN SAHARA
lad	Ladino	YE	YEMEN
lah	Lahnda	YU	YUGOSLAVIA
lam	Lamba	ZM	ZAMBIA
day	Land Dayak languages	ZW	ZIMBABWE
lao	Lao
lat	Latin
lav	Latvian
lez	Lezghian
lim	Limburgan
lin	Lingala
lit	Lithuanian
jbo	Lojban
nds	Low German
dsb	Lower Sorbian
loz	Lozi
lub	Luba-Katanga
lua	Luba-Lulua
lui	Luiseno
smj	Lule Sami
lun	Lunda
luo	Luo (Kenya and Tanzania)
lus	Lushai
ltz	Luxembourgish
mac	Macedonian
mad	Madurese
mag	Magahi
mai	Maithili
mak	Makasar
mlg	Malagasy
may	Malay
mal	Malayalam
mlt	Maltese
mnc	Manchu
mdr	Mandar
man	Mandingo
mni	Manipuri
mno	Manobo languages
glv	Manx
mao	Maori
arn	Mapudungun
mar	Marathi
chm	Mari
mah	Marshallese
mwr	Marwari
mas	Masai
myn	Mayan languages
men	Mende
mic	Mi'kmaq
min	Minangkabau
mwl	Mirandese
moh	Mohawk
mdf	Moksha
mkh	Mon-Khmer languages
lol	Mongo
mon	Mongolian
mos	Mossi
mul	Multiple languages
mun	Munda languages
nqo	N'Ko
nah	Nahuatl languages
nau	Nauru
nav	Navajo
nde	Ndebele, North
nbl	Ndebele, South
ndo	Ndonga
nap	Neapolitan
new	Nepal Bhasa
nep	Nepali
nia	Nias
nic	Niger-Kordofanian languages
ssa	Nilo-Saharan languages
niu	Niuean
zxx	No linguistic content
nog	Nogai
non	Norse, Old
nai	North American Indian languages
frr	Northern Frisian
sme	Northern Sami
nor	Norwegian
nno	Norwegian Nynorsk
nub	Nubian languages
nym	Nyamwezi
nyn	Nyankole
nyo	Nyoro
nzi	Nzima
oci	Occitan (post 1500)
arc	Official Aramaic (700-300 BCE)
oji	Ojibwa
ori	Oriya
orm	Oromo
osa	Osage
oss	Ossetian
oto	Otomian languages
pal	Pahlavi
pau	Palauan
pli	Pali
pam	Pampanga
pag	Pangasinan
pan	Panjabi
pap	Papiamento
paa	Papuan languages
nso	Pedi
per	Persian
peo	Persian, Old (ca.600-400 B.C.)
phi	Philippine languages
phn	Phoenician
pon	Pohnpeian
pol	Polish
por	Portuguese
pra	Prakrit languages
pro	ProvenÃ§al, Old (to 1500)
pus	Pushto
que	Quechua
raj	Rajasthani
rap	Rapanui
rar	Rarotongan
qaa-qtz	Reserved for local use
roa	Romance languages
rum	Romanian
roh	Romansh
rom	Romany
run	Rundi
rus	Russian
sal	Salishan languages
sam	Samaritan Aramaic
smi	Sami languages
smo	Samoan
sad	Sandawe
sag	Sango
san	Sanskrit
sat	Santali
srd	Sardinian
sas	Sasak
sco	Scots
sel	Selkup
sem	Semitic languages
srp	Serbian
srr	Serer
shn	Shan
sna	Shona
iii	Sichuan Yi
scn	Sicilian
sid	Sidamo
sgn	Sign Languages
bla	Siksika
snd	Sindhi
sin	Sinhala
sit	Sino-Tibetan languages
sio	Siouan languages
sms	Skolt Sami
den	Slave (Athapascan)
sla	Slavic languages
slo	Slovak
slv	Slovenian
sog	Sogdian
som	Somali
son	Songhai languages
snk	Soninke
wen	Sorbian languages
sot	Sotho, Southern
sai	South American Indian (Other)
alt	Southern Altai
sma	Southern Sami
spa	Spanish
srn	Sranan Tongo
suk	Sukuma
sux	Sumerian
sun	Sundanese
sus	Susu
swa	Swahili
ssw	Swati
swe	Swedish
gsw	Swiss German
syr	Syriac
tgl	Tagalog
tah	Tahitian
tai	Tai languages
tgk	Tajik
tmh	Tamashek
tam	Tamil
tat	Tatar
tel	Telugu
ter	Tereno
tet	Tetum
tha	Thai
tib	Tibetan
tig	Tigre
tir	Tigrinya
tem	Timne
tiv	Tiv
tli	Tlingit
tpi	Tok Pisin
tkl	Tokelau
tog	Tonga (Nyasa)
ton	Tonga (Tonga Islands)
tsi	Tsimshian
tso	Tsonga
tsn	Tswana
tum	Tumbuka
tup	Tupi languages
tur	Turkish
ota	Turkish, Ottoman (1500-1928)
tuk	Turkmen
tvl	Tuvalu
tyv	Tuvinian
twi	Twi
udm	Udmurt
uga	Ugaritic
uig	Uighur
ukr	Ukrainian
umb	Umbundu
mis	Uncoded languages
und	Undetermined
hsb	Upper Sorbian
urd	Urdu
uzb	Uzbek
vai	Vai
ven	Venda
vie	Vietnamese
vol	Volapük
vot	Votic
wak	Wakashan languages
wal	Walamo
wln	Walloon
war	Waray
was	Washo
wel	Welsh
fry	Western Frisian
wol	Wolof
xho	Xhosa
sah	Yakut
yao	Yao
yap	Yapese
yid	Yiddish
yor	Yoruba
ypk	Yupik languages
znd	Zande languages
zap	Zapotec
zza	Zaza
zen	Zenaga
zha	Zhuang
zul	Zulu
zun	Zuni
